# Supplementary material for: Unusual coordination mode for 1,3-diphosphete ligands towards a Cr–Cr quintuple bond complex
Source: Royal Society of Chemistry journal article supplement (doi:10.1039/d3cc01358h), 2023-01-01
Supplement: d3cc01358h1.pdf [file d3cc01358h1.pdf]

## Supporting Information

### Unusual Coordination Mode for 1,3-Diphosphete Ligands Towards Cr-Cr Quintuple Bond Complex

Mehdi Elsayed Moussa,<sup>a†</sup> Eva-Maria Rummel,<sup>a†</sup> Gábor Balázs,<sup>a</sup> Awal Noor,<sup>b</sup> Rhett Kempe,<sup>b</sup> Christoph Riesinger<sup>a</sup> and Manfred Scheer<sup>a\*</sup>

<sup>†</sup>These authors contributed equally to this work.

- a) Department of Inorganic Chemistry, University of Regensburg, GER-93040 Regensburg  
b) Department of Organic Chemistry, University of Bayreuth, GER-95447 Bayreuth

#### Content:

|                                |    |
|--------------------------------|----|
| 1. Experimental .....          | 2  |
| 2. NMR Spectra.....            | 4  |
| 3. Crystallographic Data ..... | 6  |
| 4. Computational Data .....    | 9  |
| 5. References.....             | 29 |

## 1. Experimental

All steps were performed under an atmosphere of dry Argon with standard schlenk techniques. All solvents were freshly collected from a Solvent Purification System by M. Braun and were degassed prior to use. All NMR spectra have been recorded using deuterated benzene, which was dried over Na/K alloy, refluxed for three hours and then distilled under inert atmosphere.  $t\text{BuC}\equiv\text{P}$ ,<sup>[1]</sup>  $\text{MeC}\equiv\text{P}$ ,<sup>[2]</sup>  $\text{AdC}\equiv\text{P}$ <sup>[3]</sup> and **1**<sup>[4]</sup> have been synthesised according to literature procedure.

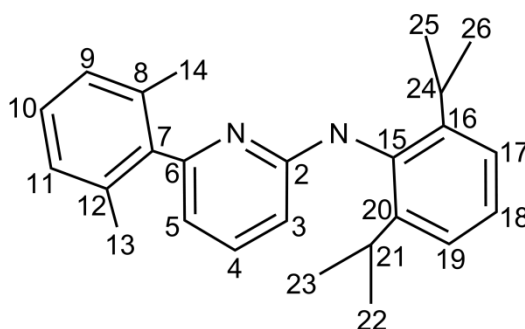

Fig. S1 Ligand numbering scheme.

### 1.1. Synthesis of 2:

To a solution of  $1.22 \cdot 10^{-4}$  mol (100 mg) **1** in 10 ml hexane is added  $2.5 \cdot 10^{-4}$  mol  $t\text{BuC}\equiv\text{P}$ . The colour of the solution instantly changes from dark violet to crimson red. After stirring overnight, the solution is filtered over silica and the solvent is removed under reduced pressure. The residue is taken up in 2 ml fresh hexane or pentane and stored at +5 °C. After some time, red crystals of **2** are formed on the solvent front while the rest of compound precipitated as a red solid. Yield (crystals + precipitate): 53 mg (43 %)

|                                      |                                                                                                                                                                                                                                                                                                                                                                                                                                                                                                                                                                                                                                                                                                                                                                                                                                   |
|--------------------------------------|-----------------------------------------------------------------------------------------------------------------------------------------------------------------------------------------------------------------------------------------------------------------------------------------------------------------------------------------------------------------------------------------------------------------------------------------------------------------------------------------------------------------------------------------------------------------------------------------------------------------------------------------------------------------------------------------------------------------------------------------------------------------------------------------------------------------------------------|
| <sup>1</sup> H-NMR                   | $\delta$ [ppm] = 0.69 (d, 3H, $J = 6.6$ Hz, $\text{H}^{22,23/25,26}$ ), 0.95 (pt, 6H, $J = 7.4$ Hz, $\text{H}^{22,23/25,26}$ ), 1.05 (s, 6H, $\text{H}^{13,14}$ ), 1.06 (s, 18H, $(t\text{BuC})_2\text{P}_2$ ), 1.12 (d, 6H, $J = 6.6$ Hz, $\text{H}^{22,23/25,26}$ ), 1.28 (d, 6H, $J = 6.6$ Hz, $\text{H}^{22,23/25,26}$ ), 1.38 (s, 6H, $\text{H}^{13,14}$ ), 3.5 (dsept, 2H, $J = 6.6$ Hz, $\text{H}^{21/24}$ ), 4.12 (sept, 2H, $J = 6.6$ Hz, $\text{H}^{21,24}$ ), 5.54 (d, 2H, $J = 6.6$ Hz, $\text{H}^3$ ), 5.6 (d, 2H, $J = 7.5$ Hz, $\text{H}^{9,11/17,19}$ ), 6.24 (d, 2H, $J = 7.4$ Hz, $\text{H}^5$ ), 6.37 (d, 2H, $J = 7.8$ Hz, $\text{H}^4$ ), 6.70 (q, 4H, $J = 7.4$ Hz, $\text{H}^{9,11/17,19}$ ), 7.02 (m, 2H, $\text{H}^{9,11/17,19}$ ), 7.19 (m, 2H, $\text{H}^{10/18}$ ), 7.26 (m, 2H, $\text{H}^{10/18}$ ) |
| <sup>31</sup> P-NMR                  | $\delta$ [ppm] = 106.7 (s)                                                                                                                                                                                                                                                                                                                                                                                                                                                                                                                                                                                                                                                                                                                                                                                                        |
| <sup>31</sup> P{ <sup>1</sup> H}-NMR | $\delta$ [ppm] = 106.7 (s)                                                                                                                                                                                                                                                                                                                                                                                                                                                                                                                                                                                                                                                                                                                                                                                                        |
| Elemental analysis                   | calculated for $\text{C}_{60}\text{H}_{76}\text{Cr}_2\text{N}_4\text{P}_2$ (1018.4 g/mol): C 70.69, H 7.52, N 5.49;<br>found: C 69.55, H 7.81, N 5.06.                                                                                                                                                                                                                                                                                                                                                                                                                                                                                                                                                                                                                                                                            |
| FD MS (toluene)                      | $m/z$ [%] = 1019 (100) [ $\text{M}^+$ ]                                                                                                                                                                                                                                                                                                                                                                                                                                                                                                                                                                                                                                                                                                                                                                                           |

### 1.2. Synthesis of 3:

To a solution of  $1.22 \cdot 10^{-4}$  mol (100 mg) **1** in 10 ml THF is added  $2.5 \cdot 10^{-4}$  mol  $\text{MeC}\equiv\text{P}$ . The colour of the solution instantly changes from dark violet to crimson red. After stirring overnight, the solution is

filtered over silica and the solvent is removed under reduced pressure. The residue is taken up in 2 ml fresh hexane and stored at +5 °C.

|                                    |                                                                                                                                                                                   |
|------------------------------------|-----------------------------------------------------------------------------------------------------------------------------------------------------------------------------------|
| $^{31}\text{P}$ -NMR               | $\delta$ [ppm] = 114.4 (s)                                                                                                                                                        |
| $^{31}\text{P}\{^1\text{H}\}$ -NMR | $\delta$ [ppm] = 114.4 (s)                                                                                                                                                        |
| FD MS (toluene)                    | $m/z$ [%] = 934.4 (10) [ $\text{M}^+$ ]; 876.4 (100) [ $\text{M}^+$ -MeCP] in a scaled version from 800-1200 Da;<br>$m/z$ [%] = 876.4 (20) [ $\text{M}^+$ -MeCP], 358.4 (100) [L] |

### 1.3. Synthesis of 4:

To a solution of  $4.88 \cdot 10^{-5}$  mol (40 mg) **1** in 10 ml hexane is added  $9.76 \cdot 10^{-5}$  mol (17.4 mg) AdC $\equiv$ P in 10 ml hexane. The colour of the solution instantly changes from dark violet to crimson red. After stirring overnight, the solution is filtered over silica and the solvent is removed under reduced pressure. The residue is taken up in 15 ml fresh pentane and stored at +5 °C. Fractionised crystallisation leads to a total yield of 32 mg (67%)

|                                    |                                                                                                                                                                                                                                                                                                                                                                                                                                                                                                                                                                                                                                                                                                                                                                                                                 |
|------------------------------------|-----------------------------------------------------------------------------------------------------------------------------------------------------------------------------------------------------------------------------------------------------------------------------------------------------------------------------------------------------------------------------------------------------------------------------------------------------------------------------------------------------------------------------------------------------------------------------------------------------------------------------------------------------------------------------------------------------------------------------------------------------------------------------------------------------------------|
| $^1\text{H}$ -NMR                  | $\delta$ [ppm] = 0.75 (d, 6H, $J = 6.9$ Hz, $\text{H}^{22,23/25,26}$ ), 0.91 (d, 6H, $J = 7.4$ Hz, $\text{H}^{22,23/25,26}$ ), 1.07 (s, 6H, $\text{H}^{13,14}$ ), 1.12 (d, 6H, $J = 6.7$ Hz, $\text{H}^{22,23/25,26}$ ), 1.37 (d, 6H, $J = 6.9$ Hz, $\text{H}^{22,23/25,26}$ ), 1.70 (t, 2.6 Hz, 3H, AdCP), 1.38 (s, 6H, $\text{H}^{13,14}$ ), 1.94 (br, 6H, AdCP), 2.5 (br, 6H, AdCP), 3.45 (sept, 2H, $J = 6.7$ Hz, $\text{H}^{21/24}$ ), 3.98 (sept, 2H, $J = 6.7$ Hz, $\text{H}^{21,24}$ ), 5.54 (d, 2H, $J = 6.7$ Hz, $\text{H}^3$ ), 5.66 (d, 2H, $J = 7.2$ Hz, $\text{H}^{9,11/17,19}$ ), 6.24 (m, 2H, $\text{H}^5$ ), 6.37 (m, 2H, $\text{H}^4$ ), 6.70 (m, 4H, $\text{H}^{9,11/17,19}$ ), 7.02 (m, 2H, $\text{H}^{9,11/17,19}$ ), 7.19 (m, 2H, $\text{H}^{10/18}$ ), 7.26 (m, 2H, $\text{H}^{10/18}$ ) |
| $^{31}\text{P}$ -NMR               | $\delta$ [ppm] = 460.6 (s)                                                                                                                                                                                                                                                                                                                                                                                                                                                                                                                                                                                                                                                                                                                                                                                      |
| $^{31}\text{P}\{^1\text{H}\}$ -NMR | $\delta$ [ppm] = 460.6 (s)                                                                                                                                                                                                                                                                                                                                                                                                                                                                                                                                                                                                                                                                                                                                                                                      |
| FD MS (toluene)                    | $m/z$ [%] = 996.4 (100) [ $\text{M}^+$ ], 818.3 (20) [ $\text{1}^+$ ], 714.4 (35) [ $\text{L}_2^+$ ]                                                                                                                                                                                                                                                                                                                                                                                                                                                                                                                                                                                                                                                                                                            |

## 2. NMR Spectra

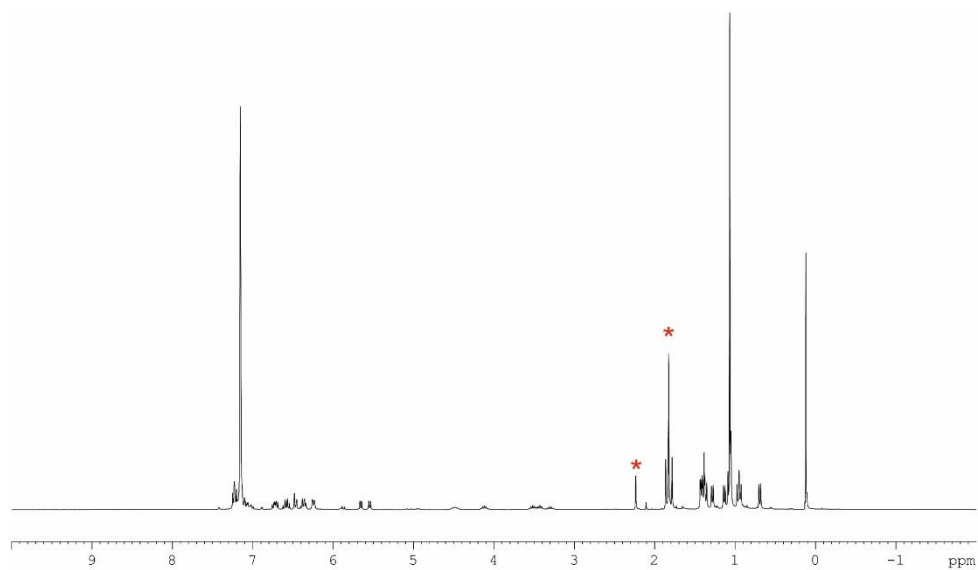

**Fig. S2**  $^1\text{H}$  NMR spectrum of **2** in  $\text{C}_6\text{D}_6$  at r.t. \* unidentified impurity.

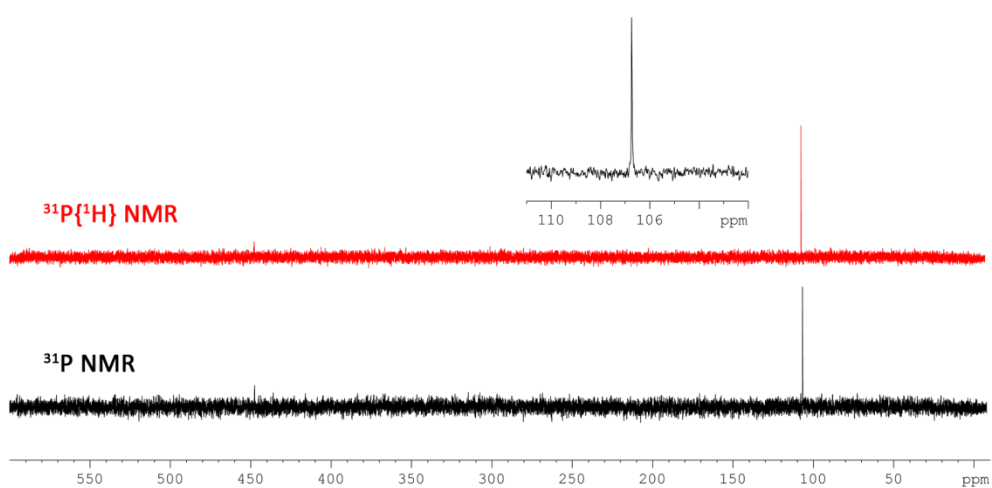

**Fig. S3**  $^{31}\text{P}$  (black) and  $^{31}\text{P}\{^1\text{H}\}$  (red) NMR spectra of **2** in  $\text{C}_6\text{D}_6$  at r.t. Main signal is the [2+2] cycloaddition product at  $\delta = 106$  ppm, with minor impurities from the side-on product (3%) at  $\delta = 450$  ppm.

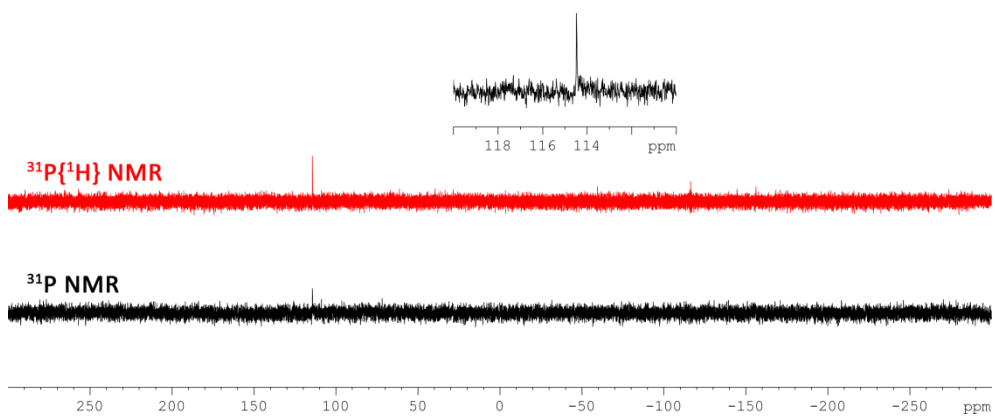

**Fig. S4**  $^{31}\text{P}$  (black) and  $^{31}\text{P}\{^1\text{H}\}$  (red) NMR spectra of **3** in  $\text{C}_6\text{D}_6$  at r.t.

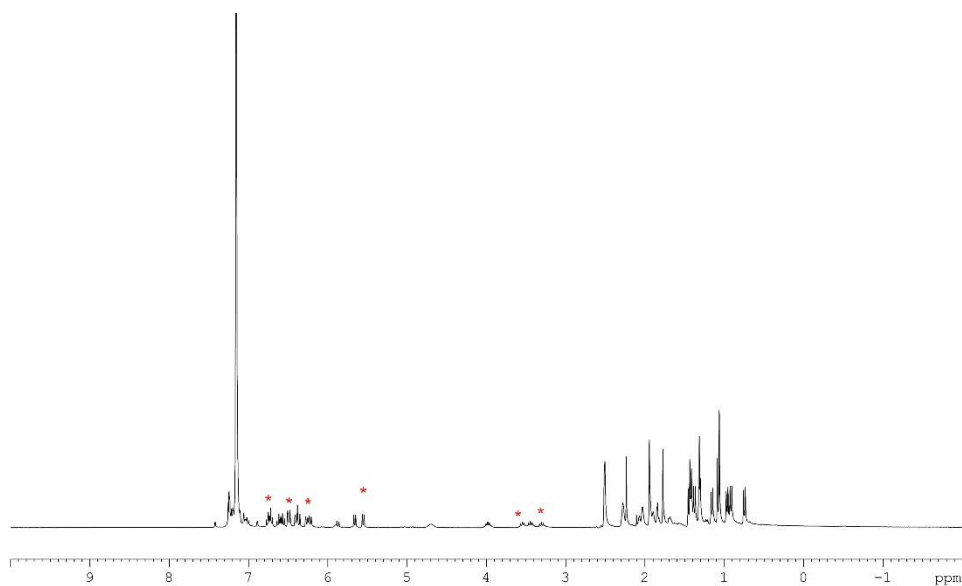

**Fig. S5**  $^1\text{H}$  NMR spectra of **4** in  $\text{C}_6\text{D}_6$  at r.t. \* signals arising from nonequivalent protons in the organic ligands.

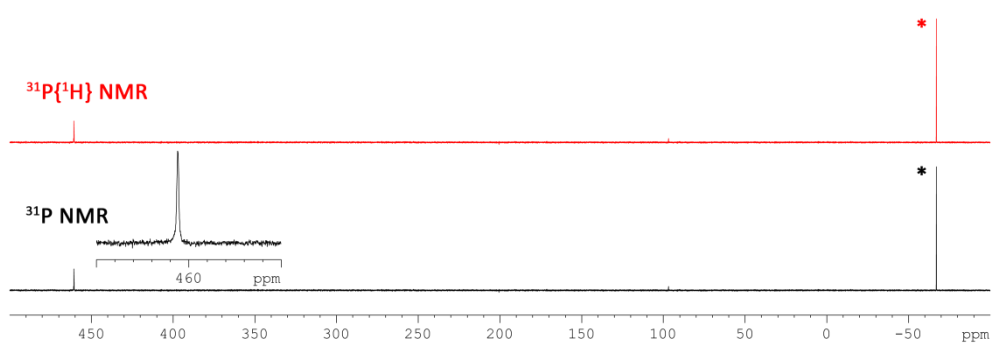

**Fig. S6**  $^{31}\text{P}$  (black) and  $^{31}\text{P}\{^1\text{H}\}$  (red) NMR spectra of reaction mixtures of **4** in  $\text{C}_6\text{D}_6$  at r.t. Signal marked with an asterisk is residual  $\text{AdC}\equiv\text{P}$ . Main product of the reaction is the side-on complex **4** at  $\delta = 460$  ppm with minor impurities from the cycloaddition product at  $\delta = 100$  ppm (5%).

### 3. Crystallographic Data

Using Olex2,<sup>[5]</sup> all structures were solved with the ShelXT structure solution program,<sup>[6]</sup> using the Direct Methods solution method. The model was refined with version 2014/6 of ShelXL using Least Squares minimisation.<sup>[7]</sup> Experimental and crystal data created by ReportPlus in Olex2.

#### 3.1. Compound 2

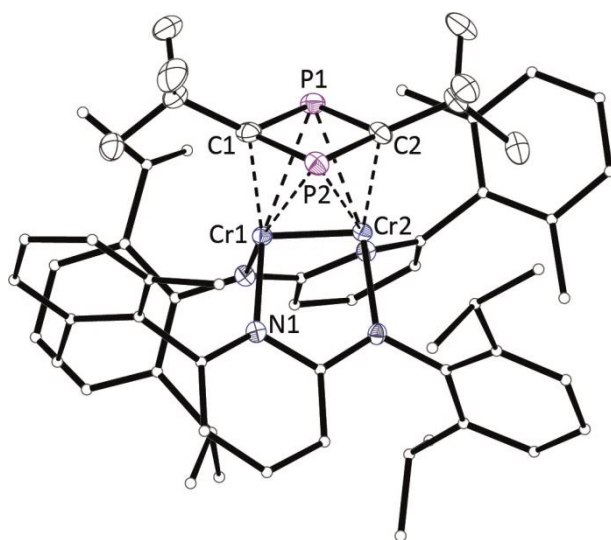

**Fig. S7** Molecular structure of **2** in the solid state. Hydrogen atoms are omitted, carbon atoms of the ligand are shown in a ball-and-stick representation for clarity. Thermal ellipsoids are shown at 50% probability level. Selected bond lengths [Å] and angles [°]: Cr1-Cr2 1.8694(3), P1-P2 2.6708(6), P1-C1 1.8076(17), P1-C6 1.8195(16), P2-C1 1.8184(16), P2-C6 1.8051(17), C1-P1-C6 85.03(8), C6-P2-C1 85.13(8), P1-C1-P2 94.88(8), P2-C6-P1 94.93(8).

Single red block-shaped crystals of **2** were obtained by recrystallisation from hexane. A suitable crystal (0.21×0.12×0.09) was selected and mounted on a mylar loop on a SuperNova, Single source at offset, Atlas diffractometer. The crystal was kept at  $T = 123.01(10)$  K during data collection.

### 3.2. Compound 4

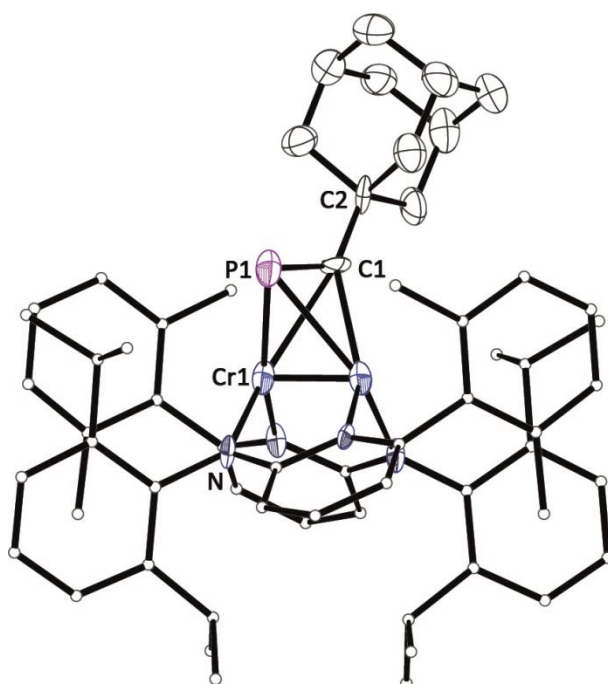

**Fig. S8** Molecular structure of **4** in the solid state. Hydrogen atoms are omitted, carbon atoms of the ligand are shown in a ball-and-stick representation for clarity. Thermal ellipsoids are shown at 50% probability level. Selected bond lengths [Å] and angles [°]: Cr1-Cr1' 1.8054(13), Cr1-P1 2.674(3), Cr1-C1 2.117(8), Cr1-C1' 2.388(9), C1-P1 1.731(16), Cr1'-Cr1-C1 74.5(3), Cr1'-Cr1-P1 58.42(6), C2-C1-P1 121.9(7).

Single clear red plate-shaped crystals of **4** were obtained by recrystallisation from hexane. A suitable crystal (0.10×0.07×0.02) was selected and mounted on a mitogen holder on a GV50, TitanS2 diffractometer. The crystal was kept at  $T = 123.1(3)$  K during data collection.

CCDC reference numbers 2247228 (**2**) and, 2247229 (**4**) contain the supplementary crystallographic data for this paper. These data can be obtained free of charge at [www.ccdc.cam.ac.uk/conts/retrieving.html](http://www.ccdc.cam.ac.uk/conts/retrieving.html) (or from the Cambridge Crystallographic Data Center, 12 Union Road, Cambridge CB2 1EZ, UK; Fax: (internat.) + 44-1223-336-033; e-mail: [deposit@ccdc.cam.ac.uk](mailto:deposit@ccdc.cam.ac.uk)).

**Table S1.** Crystal data and structure refinement for compounds **2** and **4**.

| Compound                                    | <b>2</b>                                                                      | <b>4</b>                                                         |
|---------------------------------------------|-------------------------------------------------------------------------------|------------------------------------------------------------------|
| Empirical formula                           | C <sub>66</sub> H <sub>90</sub> Cr <sub>2</sub> N <sub>4</sub> P <sub>2</sub> | C <sub>61</sub> H <sub>73</sub> Cr <sub>2</sub> N <sub>4</sub> P |
| Formula weight                              | 1105.35                                                                       | 997.20                                                           |
| Temperature/K                               | 123.01                                                                        | 123.1                                                            |
| Crystal system                              | triclinic                                                                     | monoclinic                                                       |
| Space group                                 | P-1                                                                           | P2/c                                                             |
| a/Å                                         | 12.8677(2)                                                                    | 10.2784(6)                                                       |
| b/Å                                         | 13.10453(19)                                                                  | 22.2038(13)                                                      |
| c/Å                                         | 18.2132(3)                                                                    | 12.5344(5)                                                       |
| α/°                                         | 99.9375(13)                                                                   | 90                                                               |
| β/°                                         | 90.7104(13)                                                                   | 105.268(5)                                                       |
| γ/°                                         | 92.7071(12)                                                                   | 90                                                               |
| Volume/Å <sup>3</sup>                       | 3021.09(8)                                                                    | 2759.6(3)                                                        |
| Z                                           | 2                                                                             | 2                                                                |
| ρ <sub>calc</sub> /cm <sup>3</sup>          | 1.215                                                                         | 1.200                                                            |
| μ/mm <sup>-1</sup>                          | 3.776                                                                         | 3.820                                                            |
| F(000)                                      | 1184.0                                                                        | 1060.0                                                           |
| Crystal size/mm <sup>3</sup>                | 0.2143 × 0.1185 × 0.0946                                                      | 0.1008 × 0.0728 × 0.0211                                         |
| Radiation                                   | CuKα (λ = 1.54184)                                                            | CuKα (λ = 1.54184)                                               |
| 2θ range for data collection/°              | 6.856 to 147.522                                                              | 8.326 to 148.754                                                 |
| Index ranges                                | -15 ≤ h ≤ 15, -16 ≤ k ≤ 15, -20 ≤ l ≤ 22                                      | -12 ≤ h ≤ 7, -26 ≤ k ≤ 18, -14 ≤ l ≤ 15                          |
| Reflections collected                       | 43882                                                                         | 9570                                                             |
| Independent reflections                     | 11915 [R <sub>int</sub> = 0.0237, R <sub>sigma</sub> = 0.0205]                | 5342 [R <sub>int</sub> = 0.0423, R <sub>sigma</sub> = 0.0596]    |
| Data/restraints/parameters                  | 11915/0/687                                                                   | 5342/0/367                                                       |
| Goodness-of-fit on F <sup>2</sup>           | 1.046                                                                         | 1.067                                                            |
| Final R indexes [I > 2σ(I)]                 | R <sub>1</sub> = 0.0313, wR <sub>2</sub> = 0.0832                             | R <sub>1</sub> = 0.0835, wR <sub>2</sub> = 0.2358                |
| Final R indexes [all data]                  | R <sub>1</sub> = 0.0360, wR <sub>2</sub> = 0.0874                             | R <sub>1</sub> = 0.1074, wR <sub>2</sub> = 0.2465                |
| Largest diff. peak/hole / e Å <sup>-3</sup> | 0.48/-0.35                                                                    | 1.36/-0.76                                                       |



## 4. Computational Data

The DFT calculations have been performed with the TURBOMOLE program package<sup>[8][9]</sup> at the RI<sup>[10]</sup>-B3LYP<sup>[11]</sup>/def2-TZVP<sup>[12]</sup> level of theory. To speed up the geometry optimization the Multipole Accelerated Resolution-of-the-Identity (MARI-J)<sup>[13]</sup> approximation has been used. The final energy of the molecules was determined by single point calculations without using the RI formalism. For the calculation of the reaction energies the SCF energies were used without corrections.

**Table S2.** Calculated reaction energies (kJ·mol<sup>-1</sup>) of different transformations at the B3LYP/def2-TZVP level of theory.

| Transformation                                                                                           | Reaction Energy (kJ·mol <sup>-1</sup> ) |
|----------------------------------------------------------------------------------------------------------|-----------------------------------------|
| 2 MeCP = 1,3-(MeCP) <sub>2</sub>                                                                         | -6.56                                   |
| 2 MeCP = 1,2-(MeCP) <sub>2</sub>                                                                         | -54.91                                  |
| 2 tBuCP = 1,3-(tBuCP) <sub>2</sub>                                                                       | -1.42                                   |
| 2 tBuCP = 1,2-(tBuCP) <sub>2</sub>                                                                       | 0.28                                    |
| 2 AdCP = 1,3-(AdCP) <sub>2</sub>                                                                         | 0.16                                    |
| 2 AdCP = 1,2-(AdCP) <sub>2</sub>                                                                         | 5.28                                    |
| L <sub>2</sub> Cr <sub>2</sub> + 2 MeCP = L <sub>2</sub> Cr <sub>2</sub> {1,3-(MeCP) <sub>2</sub> }      | -208.09                                 |
| L <sub>2</sub> Cr <sub>2</sub> + 2 MeCP = L <sub>2</sub> Cr <sub>2</sub> {1,2-(MeCP) <sub>2</sub> }      | -228.86                                 |
| L <sub>2</sub> Cr <sub>2</sub> + MeCP = L <sub>2</sub> Cr <sub>2</sub> (MeCP)                            | -81.63                                  |
| L <sub>2</sub> Cr <sub>2</sub> (MeCP) + MeCP = L <sub>2</sub> Cr <sub>2</sub> {1,3-(MeCP) <sub>2</sub> } | -126.45                                 |
| L <sub>2</sub> Cr <sub>2</sub> (MeCP) + MeCP = L <sub>2</sub> Cr <sub>2</sub> {1,2-(MeCP) <sub>2</sub> } | -147.23                                 |
| L <sub>2</sub> Cr <sub>2</sub> + 2 tBuCP = L <sub>2</sub> Cr <sub>2</sub> {1,3-(tBuCP) <sub>2</sub> }    | -76.35                                  |
| L <sub>2</sub> Cr <sub>2</sub> + 2 tBuCP = L <sub>2</sub> Cr <sub>2</sub> {1,2-(tBuCP) <sub>2</sub> }    | -43.39                                  |
| L <sub>2</sub> Cr <sub>2</sub> + tBuCP = L <sub>2</sub> Cr <sub>2</sub> (tBuCP)                          | -39.69                                  |
| L <sub>2</sub> Cr <sub>2</sub> + 2 AdCP = L <sub>2</sub> Cr <sub>2</sub> {1,3-(AdCP) <sub>2</sub> }      | -47.08                                  |
| L <sub>2</sub> Cr <sub>2</sub> + AdCP = L <sub>2</sub> Cr <sub>2</sub> (AdCP)                            | -33.07                                  |
| L <sub>2</sub> Cr <sub>2</sub> (AdCP) + AdCP = L <sub>2</sub> Cr <sub>2</sub> {1,3-(AdCP) <sub>2</sub> } | -14.01                                  |
| L <sub>2</sub> Cr <sub>2</sub> (AdCP) + AdCP = L <sub>2</sub> Cr <sub>2</sub> {1,2-(AdCP) <sub>2</sub> } | 17.01                                   |

**Table S3.** Total energy (a.u.) of different compounds at the B3LYP/def2-TZVP level of theory.

| Compound                                                   | Total Energy (a.u.) |
|------------------------------------------------------------|---------------------|
| tBuCP                                                      | -537.16779293930    |
| AdCP                                                       | -769.35557890561    |
| MeCP                                                       | -419.27076490598    |
| L <sub>2</sub> Cr <sub>2</sub>                             | -4247.51261321978   |
| L <sub>2</sub> Cr <sub>2</sub> {1,3-(tBuCP) <sub>2</sub> } | -5321.87727905913   |
| L <sub>2</sub> Cr <sub>2</sub> {1,2-(tBuCP) <sub>2</sub> } | -5321.86472391464   |
| L <sub>2</sub> Cr <sub>2</sub> (tBuCP)                     | -4784.69552154092   |
| L <sub>2</sub> Cr <sub>2</sub> {1,3-(AdCP) <sub>2</sub> }  | -5786.24170203342   |
| L <sub>2</sub> Cr <sub>2</sub> {1,2-(AdCP) <sub>2</sub> }  | -5786.22988912358   |
| L <sub>2</sub> Cr <sub>2</sub> (AdCP)                      | -5016.88078836213   |
| L <sub>2</sub> Cr <sub>2</sub> {1,3-(MeCP) <sub>2</sub> }  | -5086.13339933761   |
| L <sub>2</sub> Cr <sub>2</sub> {1,2-(MeCP) <sub>2</sub> }  | -5086.14131258771   |

|                 |                   |
|-----------------|-------------------|
| $L_2Cr_2(MeCP)$ | -4666.81447104862 |
| $1,3-(tBuCP)_2$ | -1074.33612601004 |
| $1,2-(tBuCP)_2$ | -1074.33548041351 |
| $1,3-(AdCP)_2$  | -1538.71109812696 |
| $1,2-(AdCP)_2$  | -1538.70914737324 |
| $1,3-(MeCP)_2$  | -838.54402751377  |
| $1,2-(MeCP)_2$  | -838.56244330990  |

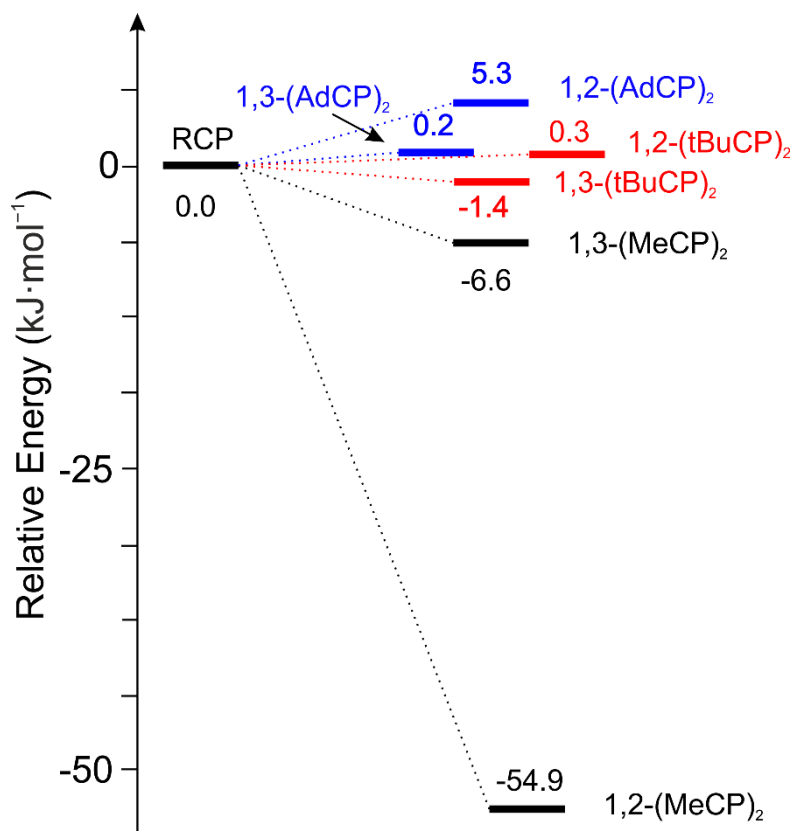

Fig. S9 Reaction energy diagram of the dimerization of different phosphalkynes.

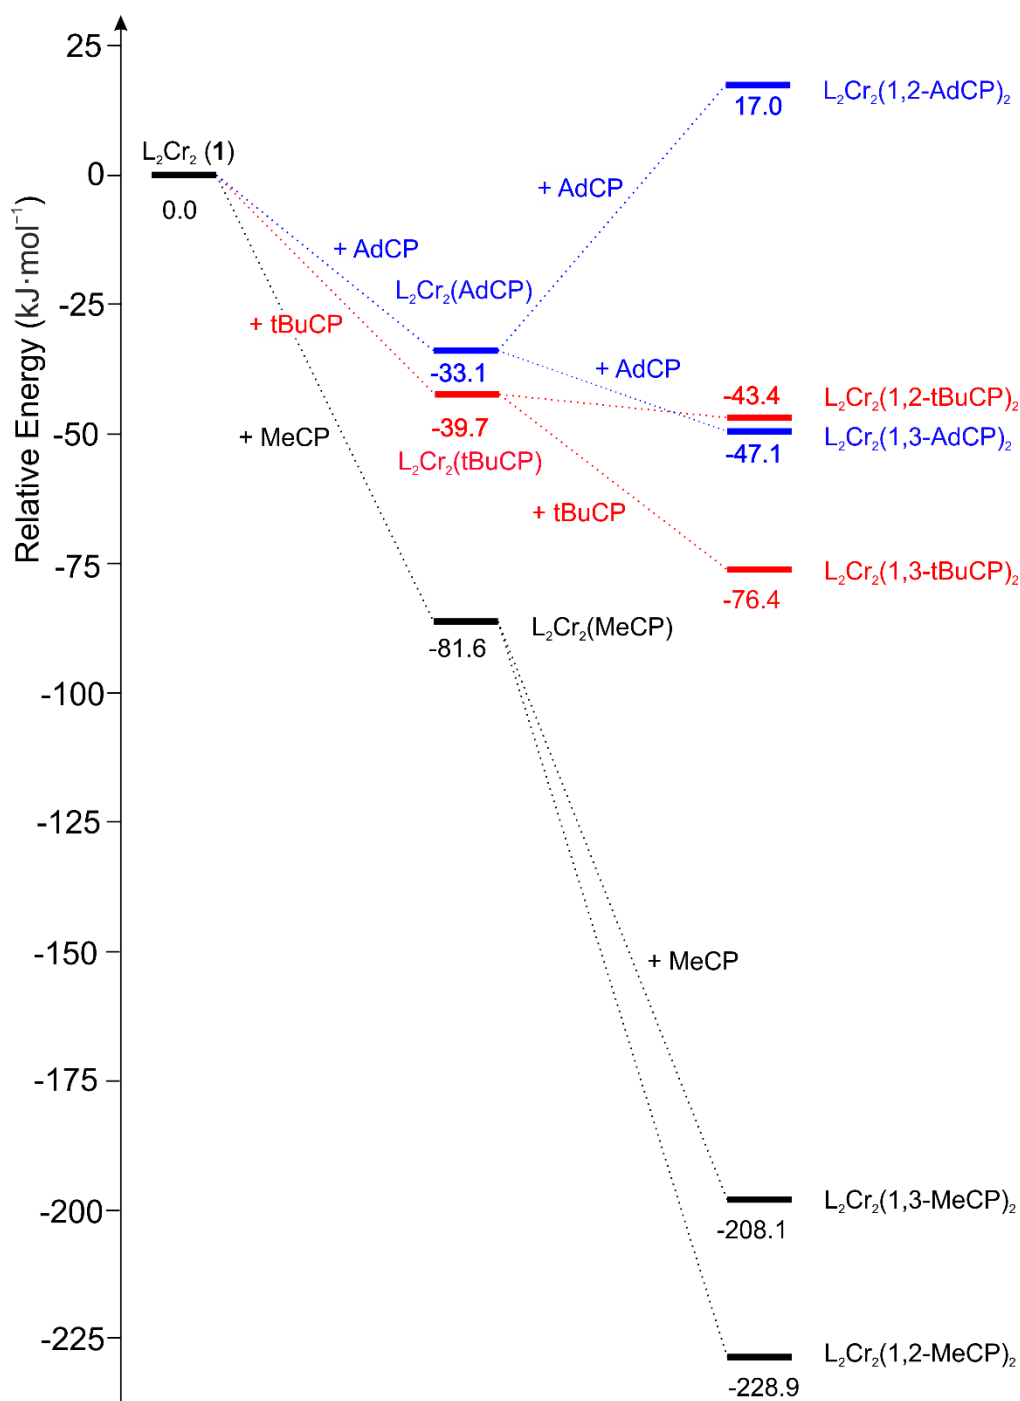

Fig. S10 Reaction energy diagram of the reaction of **1** with different phosphalkynes.

Table S4. Cartesian coordinates of the optimized geometry of  $[L_2Cr_2\{1,3-(tBuCP)_2\}]$  (**2**) at the RI-B3LYP/def2-TZVP level of theory.

| Atom | x          | y          | z          |
|------|------------|------------|------------|
| Cr   | 0.7291518  | -0.8175046 | -0.0094435 |
| Cr   | 0.6206466  | 0.9028264  | 0.0371586  |
| P    | 2.8232989  | 0.0536988  | -1.2743259 |
| P    | 2.7513220  | 0.2952350  | 1.3915693  |
| N    | -0.3462659 | -1.2095284 | -1.7806221 |
| N    | -0.7573726 | 1.0670606  | -1.4919444 |
| N    | -0.5684614 | 1.1527808  | 1.7609772  |
| N    | -0.6803024 | -1.1565078 | 1.4608943  |
| C    | 2.8354175  | -1.0424021 | 0.1535293  |
| C    | 3.5830668  | -2.3859207 | 0.3231275  |
| C    | 4.5751254  | -2.5836699 | -0.8400182 |
| H    | 4.0645003  | -2.6107638 | -1.8024277 |

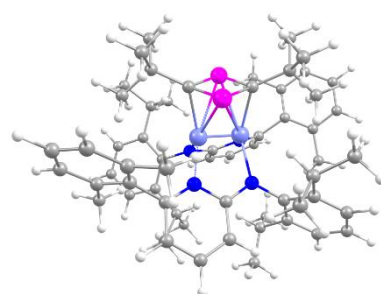

|   |            |            |            |
|---|------------|------------|------------|
| H | 5.1078156  | -3.5312732 | -0.7204877 |
| H | 5.3120093  | -1.7788917 | -0.8678405 |
| C | 2.6407852  | -3.5961716 | 0.3610090  |
| H | 1.8773263  | -3.4889619 | 1.1297842  |
| H | 3.1975767  | -4.5135793 | 0.5709407  |
| H | 2.1430734  | -3.7272502 | -0.5938669 |
| C | 4.4043550  | -2.3573369 | 1.6282006  |
| H | 5.1426549  | -1.5536409 | 1.6120159  |
| H | 4.9348975  | -3.3048941 | 1.7543217  |
| H | 3.7725911  | -2.2104596 | 2.5044450  |
| C | 2.6879909  | 1.3882852  | -0.0374058 |
| C | 3.2706817  | 2.8143401  | -0.1783315 |
| C | 4.1407634  | 2.8921845  | -1.4493357 |
| H | 4.9718033  | 2.1861333  | -1.4023996 |
| H | 4.5544639  | 3.8985944  | -1.5556091 |
| H | 3.5675733  | 2.6712114  | -2.3499623 |
| C | 2.1891907  | 3.8996370  | -0.2559883 |
| H | 1.4784752  | 3.7037719  | -1.0573116 |
| H | 2.6372553  | 4.8797100  | -0.4414032 |
| H | 1.6384121  | 3.9631439  | 0.6763989  |
| C | 4.1835323  | 3.1284529  | 1.0235959  |
| H | 3.6351792  | 3.0898133  | 1.9645713  |
| H | 4.6005396  | 4.1345428  | 0.9237087  |
| H | 5.0118900  | 2.4200313  | 1.0827093  |
| C | -1.0340433 | -0.0729701 | -2.1630525 |
| C | -1.9668916 | -0.1294786 | -3.2349831 |
| H | -2.4977184 | 0.7667265  | -3.5080910 |
| C | -2.1633638 | -1.2923174 | -3.9197979 |
| H | -2.8838071 | -1.3397433 | -4.7274239 |
| C | -1.3722834 | -2.4005369 | -3.6061061 |
| H | -1.4226482 | -3.3057972 | -4.1942984 |
| C | -0.4499090 | -2.3212799 | -2.5826678 |
| C | 0.5320345  | -3.4638500 | -2.5571861 |
| C | 1.6669744  | -3.3419411 | -3.3882910 |
| C | 2.5208360  | -4.4350772 | -3.5356197 |
| H | 3.3978266  | -4.3341324 | -4.1638811 |
| C | 2.2511046  | -5.6444294 | -2.9145929 |
| H | 2.9219264  | -6.4852145 | -3.0425436 |
| C | 1.1085073  | -5.7736462 | -2.1421444 |
| H | 0.8817664  | -6.7206208 | -1.6670427 |
| C | 0.2347085  | -4.7013185 | -1.9584194 |
| C | 1.9371555  | -2.0970118 | -4.1945163 |
| H | 1.2216373  | -2.0107265 | -5.0173270 |
| H | 2.9375485  | -2.1309094 | -4.6264162 |
| H | 1.8604183  | -1.1880015 | -3.6001545 |
| C | -1.0108784 | -4.9163120 | -1.1462734 |
| H | -1.1483553 | -4.1423673 | -0.3949980 |
| H | -0.9732576 | -5.8756208 | -0.6306894 |
| H | -1.9022574 | -4.9134996 | -1.7781716 |
| C | -1.4228027 | 2.2640509  | -1.9507472 |
| C | -0.7513781 | 3.1432398  | -2.8431422 |
| C | -1.3848606 | 4.3283728  | -3.2191810 |
| H | -0.8759395 | 5.0134909  | -3.8824445 |
| C | -2.6605712 | 4.6452340  | -2.7830868 |
| H | -3.1286780 | 5.5730444  | -3.0887301 |
| C | -3.3394257 | 3.7478274  | -1.9815055 |
| H | -4.3526868 | 3.9747151  | -1.6743338 |
| C | -2.7554254 | 2.5510556  | -1.5626236 |
| C | 0.5897017  | 2.8032868  | -3.4918217 |
| H | 1.1578061  | 2.1927249  | -2.7889041 |
| C | 1.4362189  | 4.0329551  | -3.8547116 |
| H | 1.0121805  | 4.5755992  | -4.7024165 |
| H | 2.4363762  | 3.7145684  | -4.1533163 |
| H | 1.5395196  | 4.7318360  | -3.0251847 |
| C | 0.3958241  | 1.9590345  | -4.7668441 |
| H | -0.1147771 | 1.0198402  | -4.5682538 |
| H | 1.3662647  | 1.7264916  | -5.2120418 |
| H | -0.1896858 | 2.5125675  | -5.5058550 |
| C | -3.6382383 | 1.5828016  | -0.7804680 |
| H | -3.0429229 | 0.7013077  | -0.5532341 |
| C | -4.1436726 | 2.1580908  | 0.5501676  |
| H | -3.3272569 | 2.3965350  | 1.2261981  |
| H | -4.7881779 | 1.4327468  | 1.0503560  |
| H | -4.7307598 | 3.0660462  | 0.3937589  |
| C | -4.8486150 | 1.1370353  | -1.6240270 |
| H | -5.5096364 | 1.9798047  | -1.8377757 |
| H | -5.4338807 | 0.3934132  | -1.0794738 |
| H | -4.5508234 | 0.6963623  | -2.5745672 |

|   |            |            |            |
|---|------------|------------|------------|
| C | -1.1245096 | -0.0617283 | 2.1172016  |
| C | -2.1007503 | -0.1250595 | 3.1494638  |
| H | -2.5264993 | -1.0812370 | 3.4024152  |
| C | -2.4683884 | 1.0021566  | 3.8233159  |
| H | -3.2217213 | 0.9571390  | 4.6004606  |
| C | -1.8091870 | 2.2011824  | 3.5400775  |
| H | -1.9959616 | 3.0913718  | 4.1237048  |
| C | -0.8428991 | 2.2405769  | 2.5555882  |
| C | -0.0115149 | 3.4971037  | 2.5673725  |
| C | -0.4363438 | 4.6888143  | 1.9528181  |
| C | 0.2881300  | 5.8616621  | 2.1687740  |
| H | -0.0356056 | 6.7738193  | 1.6817968  |
| C | 1.4052385  | 5.8748542  | 2.9878448  |
| H | 1.9598346  | 6.7926904  | 3.1405691  |
| C | 1.7982762  | 4.7075655  | 3.6233477  |
| H | 2.6544543  | 4.7160329  | 4.2874287  |
| C | 1.0945244  | 3.5164985  | 3.4447241  |
| C | -1.6641970 | 4.7473798  | 1.0892308  |
| H | -1.6682869 | 3.9680737  | 0.3309587  |
| H | -1.7299115 | 5.7076309  | 0.5782813  |
| H | -2.5733115 | 4.6236672  | 1.6824375  |
| C | 1.4847363  | 2.3134933  | 4.2651465  |
| H | 0.7524915  | 2.1369944  | 5.0583158  |
| H | 2.4544647  | 2.4711342  | 4.7376375  |
| H | 1.5463532  | 1.4032815  | 3.6709131  |
| C | -1.2097532 | -2.4284003 | 1.8951162  |
| C | -2.4780617 | -2.8796419 | 1.4514783  |
| C | -2.9249135 | -4.1410037 | 1.8491566  |
| H | -3.8877634 | -4.4922666 | 1.4998120  |
| C | -2.1740323 | -4.9477434 | 2.6821918  |
| H | -2.5348155 | -5.9274406 | 2.9709205  |
| C | -0.9679105 | -4.4741938 | 3.1712156  |
| H | -0.4058768 | -5.0912312 | 3.8579716  |
| C | -0.4724531 | -3.2183106 | 2.8185239  |
| C | -3.4416441 | -2.0283190 | 0.6295951  |
| H | -2.9515489 | -1.0794627 | 0.4225580  |
| C | -3.8173291 | -2.6614361 | -0.7176479 |
| H | -2.9506648 | -2.7978566 | -1.3582700 |
| H | -4.5248528 | -2.0207103 | -1.2472796 |
| H | -4.2947624 | -3.6345729 | -0.5807899 |
| C | -4.7312249 | -1.7366916 | 1.4216912  |
| H | -5.2892522 | -2.6554972 | 1.6144421  |
| H | -5.3827696 | -1.0731252 | 0.8496711  |
| H | -4.5292024 | -1.2606980 | 2.3803513  |
| C | 0.7864179  | -2.7145552 | 3.5231201  |
| H | 1.3020902  | -2.0341322 | 2.8443184  |
| C | 1.7651902  | -3.8293507 | 3.9232319  |
| H | 1.3779529  | -4.4233443 | 4.7539636  |
| H | 2.7042225  | -3.3887159 | 4.2620651  |
| H | 1.9896648  | -4.5073718 | 3.1003716  |
| C | 0.4339959  | -1.9071733 | 4.7880106  |
| H | -0.1823674 | -1.0390431 | 4.5674829  |
| H | 1.3478625  | -1.5559784 | 5.2733703  |
| H | -0.1072851 | -2.5335311 | 5.5021969  |

**Table S5.** Cartesian coordinates of the optimized geometry of  $[L_2Cr_2\{1,2-(tBuCP)_2\}]$  at the RI-B3LYP/def2-TZVP level of theory.

| Atom | x          | y          | z          |
|------|------------|------------|------------|
| Cr   | 0.6708634  | -0.3817063 | -0.3821380 |
| Cr   | 0.2617009  | 1.1938429  | 0.0755019  |
| P    | 2.2799290  | 1.2772372  | -1.6029738 |
| P    | 2.3938841  | 2.1740867  | 0.4104493  |
| C    | 3.1157576  | 0.4998364  | 0.6787874  |
| N    | -0.6037541 | -0.5910943 | -2.0675761 |
| N    | -1.2145297 | 1.5165389  | -1.2849663 |
| N    | -0.5772660 | 0.9299992  | 1.9598344  |
| N    | -0.5505619 | -1.2637527 | 1.1628817  |
| C    | 3.0835801  | -0.0709794 | -0.6078215 |
| C    | 4.0137364  | -1.1103221 | -1.2899993 |
| C    | 3.8859958  | -0.9754793 | -2.8152296 |
| H    | 2.8537298  | -1.0527910 | -3.1340133 |
| H    | 4.4448094  | -1.7762419 | -3.3036401 |
| H    | 4.2820650  | -0.0212251 | -3.1651310 |
| C    | 3.6680273  | -2.5611700 | -0.9134173 |
| H    | 3.7126864  | -2.7303371 | 0.1581231  |

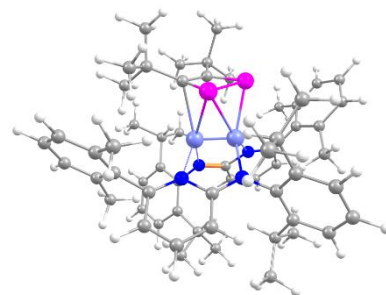

|   |            |            |            |
|---|------------|------------|------------|
| H | 4.3675401  | -3.2529490 | -1.3904469 |
| H | 2.6667156  | -2.8242497 | -1.2592710 |
| C | 5.5011747  | -0.8173175 | -0.9925395 |
| H | 5.7418952  | 0.2217783  | -1.2253265 |
| H | 6.1243680  | -1.4524208 | -1.6278590 |
| H | 5.7899897  | -1.0081615 | 0.0356731  |
| C | -1.4197214 | 0.5202374  | -2.1744655 |
| C | -2.4101304 | 0.6001003  | -3.1904767 |
| H | -3.0142307 | 1.4896337  | -3.2563075 |
| C | -2.5939283 | -0.4391722 | -4.0543144 |
| H | -3.3709540 | -0.3992036 | -4.8079691 |
| C | -1.7250749 | -1.5303905 | -3.9845778 |
| H | -1.7786806 | -2.3301679 | -4.7093955 |
| C | -0.7152381 | -1.5545253 | -3.0434455 |
| C | 0.3339158  | -2.6040847 | -3.3099486 |
| C | 1.2353799  | -2.3310331 | -4.3634145 |
| C | 2.1244748  | -3.3233603 | -4.7720561 |
| H | 2.8237570  | -3.1051920 | -5.5705630 |
| C | 2.1283870  | -4.5737636 | -4.1728776 |
| H | 2.8320689  | -5.3313512 | -4.4959333 |
| C | 1.2103614  | -4.8529705 | -3.1748019 |
| H | 1.1802887  | -5.8392152 | -2.7265280 |
| C | 0.2886795  | -3.8923971 | -2.7523085 |
| C | 1.2337321  | -1.0129936 | -5.1010218 |
| H | 0.4114419  | -0.9700518 | -5.8198627 |
| H | 2.1640867  | -0.8859460 | -5.6546819 |
| H | 1.1190481  | -0.1586013 | -4.4339640 |
| C | -0.7955294 | -4.3052643 | -1.8015557 |
| H | -1.1030083 | -3.4988935 | -1.1465590 |
| H | -0.4805298 | -5.1424789 | -1.1802802 |
| H | -1.6828424 | -4.6250763 | -2.3571320 |
| C | -1.9482987 | 2.7434112  | -1.5040489 |
| C | -1.3518095 | 3.7882635  | -2.2493631 |
| C | -2.0412979 | 4.9921819  | -2.4024447 |
| H | -1.5794877 | 5.7945752  | -2.9642242 |
| C | -3.3026430 | 5.1794787  | -1.8668362 |
| H | -3.8203114 | 6.1223883  | -1.9942707 |
| C | -3.9039644 | 4.1354380  | -1.1855104 |
| H | -4.9031231 | 4.2707449  | -0.7904201 |
| C | -3.2612852 | 2.9117010  | -0.9996643 |
| C | -0.0042332 | 3.6544112  | -2.9411192 |
| H | 0.3942118  | 2.6708321  | -2.7067681 |
| C | 1.0136463  | 4.6929726  | -2.4456655 |
| H | 0.7033231  | 5.7108125  | -2.6942930 |
| H | 1.9866411  | 4.5192133  | -2.9095395 |
| H | 1.1472407  | 4.6398392  | -1.3636847 |
| C | -0.1482504 | 3.7233503  | -4.4709983 |
| H | -0.8467956 | 2.9695365  | -4.8385726 |
| H | 0.8193504  | 3.5483919  | -4.9473269 |
| H | -0.5083938 | 4.7017718  | -4.7984099 |
| C | -4.0438420 | 1.8083385  | -0.2974565 |
| H | -3.4073821 | 0.9267371  | -0.2574867 |
| C | -4.4297434 | 2.1732380  | 1.1453051  |
| H | -3.5570248 | 2.3528953  | 1.7701420  |
| H | -4.9991571 | 1.3601511  | 1.5994926  |
| H | -5.0548129 | 3.0687634  | 1.1742730  |
| C | -5.3120946 | 1.4420767  | -1.0908747 |
| H | -6.0057095 | 2.2843474  | -1.1381643 |
| H | -5.8367334 | 0.6145418  | -0.6092723 |
| H | -5.0806154 | 1.1428179  | -2.1132938 |
| C | -0.9707489 | -0.3913254 | 2.1004794  |
| C | -1.7810680 | -0.7634013 | 3.2148250  |
| H | -2.0761560 | -1.7934509 | 3.3263550  |
| C | -2.1808020 | 0.1758749  | 4.1179830  |
| H | -2.8249597 | -0.1014402 | 4.9440102  |
| C | -1.6902482 | 1.4844827  | 4.0141608  |
| H | -1.9049724 | 2.2172868  | 4.7780949  |
| C | -0.8321995 | 1.8154635  | 2.9903852  |
| C | -0.0657818 | 3.1054921  | 3.1604762  |
| C | -0.2830566 | 4.2473903  | 2.3734653  |
| C | 0.4752376  | 5.3978589  | 2.5901876  |
| H | 0.3052309  | 6.2625341  | 1.9593316  |
| C | 1.4204386  | 5.4491093  | 3.5986111  |
| H | 2.0144845  | 6.3419856  | 3.7505497  |
| C | 1.5797535  | 4.3525221  | 4.4309276  |
| H | 2.2913987  | 4.3963415  | 5.2471050  |
| C | 0.8379041  | 3.1853230  | 4.2487808  |
| C | -1.3924521 | 4.3069802  | 1.3701932  |

|   |            |            |            |
|---|------------|------------|------------|
| H | -1.1303756 | 4.9229224  | 0.5111602  |
| H | -2.2854993 | 4.7468094  | 1.8244843  |
| H | -1.6739730 | 3.3252472  | 1.0122878  |
| C | 1.0129718  | 2.0954745  | 5.2819641  |
| H | 0.2869817  | 2.2163780  | 6.0911828  |
| H | 2.0055673  | 2.1573234  | 5.7287816  |
| H | 0.8794141  | 1.0942348  | 4.8835966  |
| C | -1.0596857 | -2.6089421 | 1.2905320  |
| C | -2.4024554 | -2.9233365 | 0.9545566  |
| C | -2.8545462 | -4.2338281 | 1.1118622  |
| H | -3.8783524 | -4.4703234 | 0.8509426  |
| C | -2.0349399 | -5.2376231 | 1.5931269  |
| H | -2.4092497 | -6.2476026 | 1.7076478  |
| C | -0.7313644 | -4.9274437 | 1.9357292  |
| H | -0.0931399 | -5.7058842 | 2.3315487  |
| C | -0.2271843 | -3.6333671 | 1.8022329  |
| C | -3.4162089 | -1.9061306 | 0.4457347  |
| H | -2.9170926 | -0.9414585 | 0.3822834  |
| C | -3.9325537 | -2.2597295 | -0.9581071 |
| H | -3.1244728 | -2.3316805 | -1.6828199 |
| H | -4.6283468 | -1.4957860 | -1.3084221 |
| H | -4.4658242 | -3.2132382 | -0.9543493 |
| C | -4.6109808 | -1.7674338 | 1.4072062  |
| H | -5.1624566 | -2.7068000 | 1.4863608  |
| H | -5.3072895 | -1.0118928 | 1.0393658  |
| H | -4.2979522 | -1.4753635 | 2.4086705  |
| C | 1.1816278  | -3.3596571 | 2.3000966  |
| H | 1.5180918  | -2.4441096 | 1.8138799  |
| C | 2.1760154  | -4.4772693 | 1.9548624  |
| H | 1.9673765  | -5.3926113 | 2.5118613  |
| H | 3.1915058  | -4.1750569 | 2.2170626  |
| H | 2.1594324  | -4.7186254 | 0.8912456  |
| C | 1.1789132  | -3.1060175 | 3.8189532  |
| H | 0.5278031  | -2.2732124 | 4.0862112  |
| H | 2.1856697  | -2.8783419 | 4.1768186  |
| H | 0.8253756  | -3.9914575 | 4.3534772  |
| C | 3.8634080  | 0.2004050  | 1.9892226  |
| C | 5.1450907  | 1.0734739  | 2.0209454  |
| H | 5.6753061  | 0.9013409  | 2.9615074  |
| H | 4.8980438  | 2.1333578  | 1.9579107  |
| C | 4.2554677  | -1.2592776 | 2.2591106  |
| H | 3.3870766  | -1.9102140 | 2.2365039  |
| H | 4.6900765  | -1.3262419 | 3.2596053  |
| C | 2.9805345  | 0.6422612  | 3.1634866  |
| H | 2.6765356  | 1.6827543  | 3.0627128  |
| H | 3.5301601  | 0.5422617  | 4.1020384  |
| H | 2.0818547  | 0.0290682  | 3.2269534  |
| H | 5.8236587  | 0.8372784  | 1.2031108  |
| H | 4.9924875  | -1.6498432 | 1.5649777  |

**Table S6.** Cartesian coordinates of the optimized geometry of  $[L_2Cr_2(tBuCP)]$  at the RI-B3LYP/def2-TZVP level of theory.

| Atom | x          | y          | z          |
|------|------------|------------|------------|
| Cr   | 0.3400064  | -0.7583549 | 0.9699413  |
| N    | -1.4225663 | 0.1077478  | 1.5686520  |
| N    | -1.6620978 | 0.2992605  | -0.7308078 |
| C    | -1.9263213 | 0.1739750  | 2.8338058  |
| C    | -3.1625885 | 0.7252387  | 3.0922607  |
| H    | -3.5267150 | 0.7672833  | 4.1090399  |
| C    | -3.9309283 | 1.2056678  | 2.0229090  |
| H    | -4.9082851 | 1.6356603  | 2.2062609  |
| C    | -3.4583334 | 1.1030930  | 0.7406475  |
| H    | -4.0515187 | 1.4352651  | -0.0973428 |
| C    | -2.1876732 | 0.5216798  | 0.4977795  |
| C    | -1.1239008 | -0.4186899 | 3.9558385  |
| C    | -1.1846890 | -1.8104261 | 4.1787291  |
| C    | -0.4633534 | -2.3612066 | 5.2358831  |
| H    | -0.5033267 | -3.4315883 | 5.3997166  |
| C    | 0.2884042  | -1.5580989 | 6.0818345  |
| H    | 0.8507846  | -2.0009768 | 6.8947606  |
| C    | 0.3057657  | -0.1872165 | 5.8883768  |
| H    | 0.8782159  | 0.4460399  | 6.5557876  |
| C    | -0.4045637 | 0.4029183  | 4.8411098  |
| C    | -2.0803061 | -2.6973498 | 3.3559891  |
| H    | -3.1281511 | -2.5512300 | 3.6354238  |

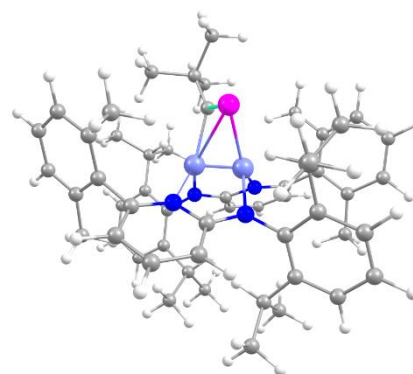

|    |            |            |            |
|----|------------|------------|------------|
| H  | -1.8365443 | -3.7476440 | 3.5164890  |
| H  | -2.0015140 | -2.4883529 | 2.2918419  |
| C  | -0.4197139 | 1.9038952  | 4.7349782  |
| H  | -0.6461934 | 2.2407176  | 3.7284591  |
| H  | 0.5424706  | 2.3234140  | 5.0276140  |
| H  | -1.1822191 | 2.3265729  | 5.3969162  |
| C  | -2.3053363 | 0.9395381  | -1.8509234 |
| C  | -2.1527131 | 2.3335496  | -2.0607401 |
| C  | -2.7652001 | 2.9266835  | -3.1651877 |
| H  | -2.6452695 | 3.9909136  | -3.3242976 |
| C  | -3.5228442 | 2.1949840  | -4.0604554 |
| H  | -3.9879048 | 2.6771410  | -4.9117082 |
| C  | -3.6892672 | 0.8392643  | -3.8423249 |
| H  | -4.3020228 | 0.2678393  | -4.5266223 |
| C  | -3.1054239 | 0.1945245  | -2.7514903 |
| C  | -1.3838056 | 3.2569889  | -1.1229075 |
| H  | -0.9705805 | 2.6570804  | -0.3134542 |
| C  | -0.2087986 | 3.9492373  | -1.8327980 |
| H  | 0.5382451  | 3.2301515  | -2.1694425 |
| H  | 0.2838696  | 4.6495795  | -1.1572463 |
| H  | -0.5443081 | 4.5170450  | -2.7030331 |
| C  | -2.3209623 | 4.3096156  | -0.5023139 |
| H  | -1.7805416 | 4.9283840  | 0.2150424  |
| H  | -3.1560650 | 3.8430127  | 0.0204370  |
| H  | -2.7321237 | 4.9727872  | -1.2664868 |
| C  | -3.4384092 | -1.2708851 | -2.5281647 |
| H  | -2.6786796 | -1.6730822 | -1.8604954 |
| C  | -4.8014438 | -1.4125159 | -1.8255468 |
| H  | -4.8134045 | -0.9036086 | -0.8611356 |
| H  | -5.0406213 | -2.4647189 | -1.6548025 |
| H  | -5.5963313 | -0.9841889 | -2.4414986 |
| C  | -3.4234404 | -2.1089371 | -3.8137746 |
| H  | -4.2348346 | -1.8323418 | -4.4901444 |
| H  | -3.5581923 | -3.1649515 | -3.5718500 |
| H  | -2.4823833 | -2.0021514 | -4.3549078 |
| C  | -0.2851518 | -2.8891383 | -0.1271630 |
| P  | 1.2845120  | -2.8603249 | 0.4958617  |
| C  | -1.1011167 | -4.1210786 | -0.5187025 |
| C  | -0.5674665 | -5.4051749 | 0.1480045  |
| H  | 0.4602702  | -5.6111289 | -0.1537519 |
| H  | -0.5856435 | -5.3182885 | 1.2361370  |
| C  | -0.9793609 | -4.2924618 | -2.0474713 |
| H  | -1.3264327 | -3.4127101 | -2.5860536 |
| H  | 0.0583860  | -4.4697027 | -2.3326713 |
| C  | -2.5830932 | -3.9741792 | -0.1273462 |
| H  | -3.0022931 | -3.0275284 | -0.4562811 |
| H  | -2.7077313 | -4.0359975 | 0.9532975  |
| Cr | -0.0005856 | -0.9251533 | -0.6840285 |
| N  | 1.6158036  | 0.1451855  | -1.4169520 |
| N  | 1.8231275  | 0.6103573  | 0.8403420  |
| C  | 2.1353123  | 0.1247651  | -2.6778550 |
| C  | 3.3001865  | 0.7896430  | -2.9976291 |
| H  | 3.6674573  | 0.7576532  | -4.0137960 |
| C  | 4.0126497  | 1.4494326  | -1.9882691 |
| H  | 4.9419794  | 1.9563106  | -2.2183121 |
| C  | 3.5494167  | 1.4127554  | -0.6996998 |
| H  | 4.1085733  | 1.8609734  | 0.1068128  |
| C  | 2.3314630  | 0.7527242  | -0.4043277 |
| C  | 1.4817742  | -0.7266853 | -3.7262630 |
| C  | 1.8822504  | -2.0737565 | -3.8398294 |
| C  | 1.3287648  | -2.8590061 | -4.8507461 |
| H  | 1.6278114  | -3.8971146 | -4.9345868 |
| C  | 0.4198734  | -2.3263571 | -5.7526221 |
| H  | -0.0024427 | -2.9498627 | -6.5313472 |
| C  | 0.0674051  | -0.9884144 | -5.6639313 |
| H  | -0.6246119 | -0.5625822 | -6.3806944 |
| C  | 0.5969291  | -0.1694073 | -4.6659852 |
| C  | 2.9505075  | -2.6613338 | -2.9529808 |
| H  | 3.9352852  | -2.2712432 | -3.2253194 |
| H  | 2.9829131  | -3.7460366 | -3.0556477 |
| H  | 2.7948799  | -2.4276373 | -1.9001067 |
| C  | 0.2594361  | 1.2964661  | -4.6565088 |
| H  | 0.0197203  | 1.6524167  | -3.6580057 |
| H  | -0.5969101 | 1.5014478  | -5.2974383 |
| H  | 1.1020353  | 1.8924772  | -5.0188269 |
| C  | 2.5225015  | 1.2048871  | 1.9504888  |
| C  | 2.3707251  | 2.5797459  | 2.2574380  |
| C  | 2.9749165  | 3.0837393  | 3.4095322  |



|   |            |            |            |
|---|------------|------------|------------|
| H | 2.8545267  | 4.1325089  | 3.6514889  |
| C | 3.7364783  | 2.2843599  | 4.2444300  |
| H | 4.1882980  | 2.6973710  | 5.1381895  |
| C | 3.9443354  | 0.9611522  | 3.8987454  |
| H | 4.5807996  | 0.3443132  | 4.5209664  |
| C | 3.3736394  | 0.4060195  | 2.7531528  |
| C | 1.6603761  | 3.5738177  | 1.3452562  |
| H | 1.2403698  | 3.0207203  | 0.5071973  |
| C | 0.5097375  | 4.3174821  | 2.0388192  |
| H | -0.3169042 | 3.6501773  | 2.2771800  |
| H | 0.1246006  | 5.1052865  | 1.3892926  |
| H | 0.8364475  | 4.7928301  | 2.9656796  |
| C | 2.6640287  | 4.5983191  | 0.7806522  |
| H | 2.1730165  | 5.2584909  | 0.0623387  |
| H | 3.4965120  | 4.1131064  | 0.2718558  |
| H | 3.0759731  | 5.2238871  | 1.5756728  |
| C | 3.7653150  | -1.0183094 | 2.3865668  |
| H | 3.2413409  | -1.2807091 | 1.4713045  |
| C | 5.2705287  | -1.1212161 | 2.0836527  |
| H | 5.5654405  | -0.4259788 | 1.2955836  |
| H | 5.5184112  | -2.1323190 | 1.7514667  |
| H | 5.8762297  | -0.9033488 | 2.9664818  |
| C | 3.3583606  | -2.0365180 | 3.4607507  |
| H | 3.8894723  | -1.8618809 | 4.3996547  |
| H | 3.5926055  | -3.0506803 | 3.1295516  |
| H | 2.2895005  | -1.9908223 | 3.6740026  |
| H | -3.1691232 | -4.7830543 | -0.5719365 |
| H | -1.1855604 | -6.2625800 | -0.1332833 |
| H | -1.5741342 | -5.1493343 | -2.3760991 |

**Table S7.** Cartesian coordinates of the optimized geometry of  $[L_2Cr_2\{1,3-(MeCP)_2\}]$  (**3**) at the RI-B3LYP/def2-TZVP level of theory.

| Atom | x          | y          | z          |
|------|------------|------------|------------|
| Cr   | 1.1305324  | -0.7931301 | -0.0109818 |
| Cr   | 1.0267337  | 0.9228845  | 0.0570993  |
| P    | 3.2269888  | 0.1454463  | -1.2786153 |
| P    | 3.1628874  | 0.2311330  | 1.4168300  |
| N    | 0.1126960  | -1.1611199 | -1.7602289 |
| N    | -0.3415756 | 1.0937568  | -1.4774076 |
| N    | -0.1050875 | 1.1617982  | 1.7576313  |
| N    | -0.2682627 | -1.1313807 | 1.4653485  |
| C    | 3.2005643  | -1.0165735 | 0.0967911  |
| C    | 3.7473502  | -2.4171168 | 0.1617776  |
| C    | 3.0598757  | 1.3860791  | 0.0381160  |
| C    | 3.4471569  | 2.8396902  | -0.0096971 |
| C    | -0.5734995 | -0.0380651 | -2.1754346 |
| C    | -1.4364035 | -0.1209894 | -3.3020879 |
| H    | -1.9777549 | 0.7582579  | -3.6119903 |
| C    | -1.5548630 | -1.2966170 | -3.9888137 |
| H    | -2.2232684 | -1.3660052 | -4.8385453 |
| C    | -0.7544938 | -2.3886163 | -3.6284115 |
| H    | -0.7459358 | -3.2942242 | -4.2184317 |
| C    | 0.1013444  | -2.2772904 | -2.5543769 |
| C    | 1.1539746  | -3.3427508 | -2.4047853 |
| C    | 2.3065019  | -3.2111984 | -3.2115815 |
| C    | 3.2750285  | -4.2140052 | -3.1764840 |
| H    | 4.1647015  | -4.1058264 | -3.7853460 |
| C    | 3.1114448  | -5.3412005 | -2.3850573 |
| H    | 3.8757755  | -6.1084582 | -2.3646821 |
| C    | 1.9570260  | -5.4859928 | -1.6331442 |
| H    | 1.8099145  | -6.3767156 | -1.0339347 |
| C    | 0.9606745  | -4.5075622 | -1.6434357 |
| C    | 2.4926355  | -2.0550029 | -4.1619304 |
| H    | 1.8445079  | -2.1657204 | -5.0358092 |
| H    | 3.5232653  | -2.0139869 | -4.5145901 |
| H    | 2.2602380  | -1.0954309 | -3.7026738 |
| C    | -0.3196107 | -4.7644742 | -0.9000834 |
| H    | -0.6462777 | -3.9010385 | -0.3285377 |
| H    | -0.2076237 | -5.5977883 | -0.2074455 |
| H    | -1.1270761 | -5.0145379 | -1.5940664 |
| C    | -0.9946571 | 2.2925256  | -1.9357101 |
| C    | -0.2748014 | 3.2175794  | -2.7329317 |
| C    | -0.9099068 | 4.3898949  | -3.1438664 |
| H    | -0.3657217 | 5.1025510  | -3.7490101 |
| C    | -2.2270198 | 4.6584388  | -2.8112199 |

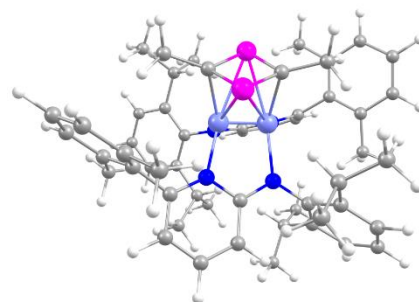

|   |            |            |            |
|---|------------|------------|------------|
| H | -2.6997720 | 5.5748080  | -3.1431581 |
| C | -2.9354084 | 3.7355227  | -2.0635271 |
| H | -3.9704007 | 3.9377573  | -1.8173324 |
| C | -2.3509225 | 2.5488673  | -1.6192596 |
| C | 1.1402348  | 2.9450221  | -3.2275007 |
| H | 1.6020534  | 2.2361187  | -2.5410409 |
| C | 2.0266548  | 4.1979334  | -3.2745630 |
| H | 1.7304452  | 4.8765882  | -4.0774038 |
| H | 3.0630076  | 3.9115310  | -3.4650657 |
| H | 1.9956799  | 4.7564106  | -2.3375524 |
| C | 1.1201900  | 2.2735391  | -4.6131237 |
| H | 0.5602266  | 1.3388512  | -4.6019811 |
| H | 2.1385079  | 2.0524378  | -4.9417818 |
| H | 0.6607281  | 2.9329122  | -5.3544107 |
| C | -3.2306284 | 1.5763308  | -0.8423002 |
| H | -2.6306132 | 0.6969445  | -0.6177885 |
| C | -3.7155264 | 2.1606532  | 0.4940873  |
| H | -2.8855521 | 2.4064077  | 1.1538856  |
| H | -4.3496927 | 1.4394137  | 1.0130676  |
| H | -4.3042450 | 3.0680031  | 0.3401438  |
| C | -4.4410617 | 1.1218209  | -1.6776483 |
| H | -5.1060720 | 1.9589962  | -1.9007387 |
| H | -5.0238765 | 0.3806410  | -1.1270966 |
| H | -4.1378345 | 0.6735866  | -2.6238117 |
| C | -0.6656799 | -0.0371307 | 2.1485846  |
| C | -1.5786020 | -0.0618571 | 3.2379770  |
| H | -2.0203014 | -1.0012177 | 3.5289327  |
| C | -1.8682441 | 1.0897052  | 3.9146265  |
| H | -2.5746450 | 1.0760450  | 4.7358222  |
| C | -1.1940143 | 2.2721704  | 3.5824743  |
| H | -1.3222222 | 3.1718702  | 4.1676622  |
| C | -0.2876789 | 2.2680646  | 2.5446070  |
| C | 0.6279575  | 3.4569790  | 2.4292803  |
| C | 0.3179503  | 4.5879571  | 1.6559792  |
| C | 1.1844827  | 5.6830567  | 1.6757201  |
| H | 0.9491906  | 6.5479064  | 1.0667355  |
| C | 2.3196308  | 5.6845510  | 2.4695963  |
| H | 2.9825250  | 6.5412242  | 2.4723540  |
| C | 2.5933685  | 4.5876072  | 3.2731084  |
| H | 3.4663392  | 4.5923167  | 3.9148965  |
| C | 1.7574192  | 3.4715755  | 3.2780745  |
| C | -0.9582362 | 4.6839458  | 0.8691094  |
| H | -1.1643065 | 3.7809381  | 0.3026890  |
| H | -0.9216277 | 5.5155898  | 0.1665545  |
| H | -1.8112322 | 4.8477858  | 1.5340547  |
| C | 2.0511712  | 2.3475542  | 4.2395491  |
| H | 1.3528782  | 2.3662759  | 5.0809206  |
| H | 3.0599630  | 2.4436743  | 4.6412468  |
| H | 1.9713846  | 1.3675289  | 3.7715600  |
| C | -0.7835417 | -2.4028848 | 1.9036338  |
| C | -2.0795268 | -2.8320211 | 1.5273085  |
| C | -2.5261263 | -4.0840557 | 1.9519930  |
| H | -3.5140040 | -4.4179404 | 1.6598694  |
| C | -1.7403036 | -4.9075693 | 2.7373784  |
| H | -2.1059344 | -5.8771672 | 3.0529254  |
| C | -0.4859488 | -4.4708139 | 3.1293267  |
| H | 0.1167502  | -5.1066449 | 3.7638750  |
| C | 0.0111834  | -3.2265835 | 2.7405091  |
| C | -3.0421468 | -1.9805812 | 0.7078178  |
| H | -2.5492623 | -1.0336553 | 0.4977944  |
| C | -3.4000797 | -2.6262815 | -0.6400835 |
| H | -2.5214014 | -2.7792491 | -1.2636266 |
| H | -4.0918171 | -1.9871326 | -1.1920410 |
| H | -3.8863152 | -3.5945626 | -0.4994025 |
| C | -4.3313321 | -1.6775973 | 1.4928334  |
| H | -4.8923939 | -2.5910601 | 1.7016276  |
| H | -4.9823605 | -1.0207770 | 0.9123829  |
| H | -4.1239227 | -1.1873688 | 2.4440578  |
| C | 1.3543073  | -2.7734826 | 3.2997769  |
| H | 1.7537926  | -2.0110401 | 2.6318154  |
| C | 2.3916261  | -3.9015902 | 3.3968019  |
| H | 2.1503350  | -4.6106943 | 4.1918121  |
| H | 3.3730168  | -3.4833039 | 3.6297447  |
| H | 2.4746252  | -4.4623107 | 2.4644305  |
| C | 1.1818264  | -2.1103173 | 4.6788376  |
| H | 0.5027117  | -1.2593757 | 4.6361717  |
| H | 2.1454144  | -1.7547894 | 5.0515875  |
| H | 0.7815421  | -2.8252250 | 5.4027615  |

|   |           |            |            |
|---|-----------|------------|------------|
| H | 3.3671100 | -2.9659748 | 1.0244365  |
| H | 4.8384442 | -2.4021009 | 0.2524131  |
| H | 3.5066324 | -2.9933653 | -0.7311091 |
| H | 3.0856116 | 3.3914492  | 0.8576622  |
| H | 4.5364362 | 2.9488214  | -0.0310377 |
| H | 3.0634803 | 3.3348151  | -0.9027454 |

**Table S8.** Cartesian coordinates of the optimized geometry of  $[L_2Cr_2\{1,2-(MeCP)_2\}]$  at the RI-B3LYP/def2-TZVP level of theory.

| Atom | x          | y          | z          |
|------|------------|------------|------------|
| Cr   | 1.1719898  | -0.5394407 | -0.3613328 |
| Cr   | 0.8880429  | 1.0740702  | 0.1185639  |
| P    | 2.9863798  | 0.8274691  | -1.6157649 |
| P    | 3.1000645  | 1.8811611  | 0.3489817  |
| C    | 3.3019371  | 0.1342830  | 0.8008944  |
| N    | 0.0072479  | -0.5913456 | -2.0733070 |
| N    | -0.5394351 | 1.5107364  | -1.2617646 |
| N    | 0.1625087  | 0.7742085  | 2.0141443  |
| N    | 0.1592445  | -1.4133750 | 1.2317562  |
| C    | 3.3297275  | -0.5360549 | -0.4481109 |
| C    | 4.0535290  | -1.8185369 | -0.7619721 |
| C    | -0.6579570 | 0.6059844  | -2.2563400 |
| C    | -1.3580419 | 0.8539228  | -3.4651466 |
| H    | -1.8290546 | 1.8135426  | -3.6040420 |
| C    | -1.4093578 | -0.1041783 | -4.4373756 |
| H    | -1.9515435 | 0.0781285  | -5.3573396 |
| C    | -0.7124120 | -1.3039631 | -4.2524671 |
| H    | -0.6905198 | -2.0614003 | -5.0231330 |
| C    | 0.0168543  | -1.4994484 | -3.0997584 |
| C    | 0.9072567  | -2.7097297 | -3.0652102 |
| C    | 2.1258645  | -2.6633249 | -3.7756252 |
| C    | 2.9168418  | -3.8109934 | -3.8342693 |
| H    | 3.8592383  | -3.7722650 | -4.3679194 |
| C    | 2.5133933  | -4.9925310 | -3.2299328 |
| H    | 3.1428653  | -5.8726724 | -3.2811168 |
| C    | 1.2904003  | -5.0459338 | -2.5808123 |
| H    | 0.9520687  | -5.9744277 | -2.1362555 |
| C    | 0.4667606  | -3.9214419 | -2.5069935 |
| C    | 2.5721439  | -1.4356494 | -4.5294177 |
| H    | 2.0421400  | -1.3546355 | -5.4827284 |
| H    | 3.6389310  | -1.4881350 | -4.7490965 |
| H    | 2.3870412  | -0.5133603 | -3.9809656 |
| C    | -0.9110605 | -4.0580066 | -1.9253269 |
| H    | -1.2129152 | -3.1682128 | -1.3832713 |
| H    | -0.9695079 | -4.9042834 | -1.2427472 |
| H    | -1.6450127 | -4.2175987 | -2.7218104 |
| C    | -1.2655818 | 2.7485540  | -1.3861442 |
| C    | -0.5711003 | 3.9355613  | -1.7251588 |
| C    | -1.2754552 | 5.1381484  | -1.7917642 |
| H    | -0.7432697 | 6.0461736  | -2.0448422 |
| C    | -2.6391734 | 5.1935763  | -1.5676140 |
| H    | -3.1688796 | 6.1364433  | -1.6298984 |
| C    | -3.3225378 | 4.0228311  | -1.2875400 |
| H    | -4.3948987 | 4.0634320  | -1.1420924 |
| C    | -2.6719640 | 2.7926701  | -1.1931261 |
| C    | 0.8998101  | 3.9529884  | -2.1188156 |
| H    | 1.3210812  | 2.9808236  | -1.8730652 |
| C    | 1.7167978  | 5.0134742  | -1.3677592 |
| H    | 1.4134460  | 6.0273318  | -1.6394740 |
| H    | 2.7755363  | 4.9132141  | -1.6165547 |
| H    | 1.6131391  | 4.9096901  | -0.2876372 |
| C    | 1.0540553  | 4.1268768  | -3.6404438 |
| H    | 0.5252119  | 3.3443126  | -4.1869528 |
| H    | 2.1087410  | 4.0794135  | -3.9214098 |
| H    | 0.6603420  | 5.0920880  | -3.9693849 |
| C    | -3.5455661 | 1.5614660  | -0.9514140 |
| H    | -2.8935402 | 0.6928753  | -0.8705756 |
| C    | -4.3706556 | 1.6494286  | 0.3438838  |
| H    | -3.7453473 | 1.6506793  | 1.2339768  |
| H    | -5.0472735 | 0.7955594  | 0.4133931  |
| H    | -4.9861025 | 2.5507394  | 0.3660610  |
| C    | -4.5107882 | 1.3247780  | -2.1300278 |
| H    | -5.2438817 | 2.1316002  | -2.2012865 |
| H    | -5.0598964 | 0.3913967  | -1.9872825 |
| H    | -3.9889438 | 1.2606077  | -3.0829606 |

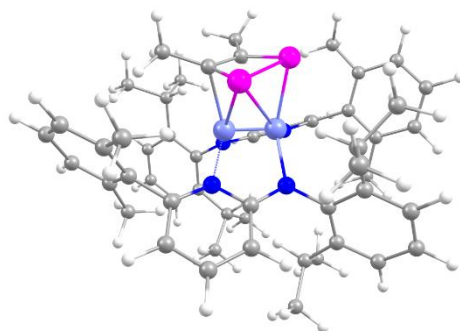

|   |            |            |            |
|---|------------|------------|------------|
| C | -0.0598711 | -0.5675632 | 2.2626494  |
| C | -0.4613103 | -0.9853233 | 3.5607485  |
| H | -0.6410419 | -2.0337258 | 3.7391244  |
| C | -0.5881454 | -0.0699445 | 4.5671545  |
| H | -0.8827599 | -0.3890731 | 5.5596521  |
| C | -0.3042141 | 1.2790817  | 4.3141268  |
| H | -0.3695456 | 2.0204347  | 5.0977748  |
| C | 0.0791340  | 1.6702537  | 3.0511245  |
| C | 0.4253860  | 3.1185971  | 2.8495296  |
| C | -0.5632907 | 4.0222043  | 2.4233641  |
| C | -0.2481039 | 5.3746388  | 2.3044311  |
| H | -1.0087469 | 6.0635901  | 1.9573671  |
| C | 1.0166039  | 5.8407255  | 2.6294666  |
| H | 1.2535714  | 6.8925637  | 2.5251685  |
| C | 1.9720828  | 4.9550640  | 3.1020672  |
| H | 2.9556540  | 5.3178457  | 3.3770044  |
| C | 1.6922406  | 3.5949692  | 3.2344997  |
| C | -1.9721255 | 3.5647154  | 2.1765665  |
| H | -2.5168437 | 4.2799067  | 1.5629694  |
| H | -2.5106532 | 3.4496254  | 3.1226834  |
| H | -1.9961271 | 2.6020531  | 1.6748339  |
| C | 2.7397786  | 2.7033241  | 3.8491977  |
| H | 2.6696713  | 2.7284357  | 4.9414436  |
| H | 3.7407324  | 3.0406276  | 3.5774987  |
| H | 2.6347231  | 1.6656850  | 3.5475529  |
| C | -0.3589264 | -2.7487096 | 1.3904218  |
| C | -1.7575016 | -2.9746823 | 1.3042129  |
| C | -2.2453724 | -4.2690459 | 1.4798406  |
| H | -3.3123771 | -4.4426852 | 1.4184638  |
| C | -1.4042582 | -5.3380967 | 1.7336802  |
| H | -1.8067914 | -6.3348511 | 1.8670816  |
| C | -0.0426481 | -5.1124654 | 1.8260486  |
| H | 0.6146787  | -5.9435035 | 2.0461660  |
| C | 0.5012557  | -3.8363940 | 1.6697724  |
| C | -2.7844565 | -1.8700910 | 1.0679500  |
| H | -2.2493903 | -0.9334079 | 0.9176002  |
| C | -3.6352447 | -2.1220290 | -0.1884751 |
| H | -3.0334099 | -2.1171663 | -1.0966327 |
| H | -4.3946224 | -1.3455763 | -0.2890725 |
| H | -4.1546968 | -3.0808689 | -0.1365171 |
| C | -3.7068147 | -1.6999096 | 2.2896987  |
| H | -4.3123213 | -2.5945811 | 2.4523397  |
| H | -4.3894563 | -0.8618447 | 2.1379452  |
| H | -3.1392381 | -1.5094578 | 3.2000213  |
| C | 1.9943094  | -3.6635873 | 1.9028247  |
| H | 2.2701841  | -2.6874269 | 1.5095442  |
| C | 2.8446384  | -4.7210278 | 1.1841557  |
| H | 2.6771922  | -5.7206605 | 1.5901298  |
| H | 3.9072553  | -4.5022086 | 1.3133763  |
| H | 2.6314786  | -4.7517256 | 0.1151647  |
| C | 2.3172164  | -3.6628139 | 3.4083008  |
| H | 1.7753149  | -2.8779149 | 3.9369246  |
| H | 3.3857972  | -3.5032186 | 3.5722336  |
| H | 2.0489586  | -4.6199462 | 3.8626568  |
| C | 3.7075758  | -0.4285248 | 2.1351137  |
| H | 2.8675388  | -0.5285362 | 2.8264744  |
| H | 4.1606543  | -1.4147942 | 2.0271925  |
| H | 5.1240299  | -1.6195979 | -0.8827350 |
| H | 4.4439003  | 0.2208354  | 2.6128632  |
| H | 3.9494160  | -2.5609875 | 0.0275400  |
| H | 3.7003743  | -2.2705050 | -1.6873816 |

**Table S9.** Cartesian coordinates of the optimized geometry of  $[L_2Cr_2(MeCP)]$  at the RI-B3LYP/def2-TZVP level of theory.

| Atom | x          | y          | z          |
|------|------------|------------|------------|
| Cr   | 0.2762614  | -1.0560023 | 0.8991334  |
| N    | -1.4390510 | -0.1440283 | 1.5441201  |
| N    | -1.6854856 | 0.1154492  | -0.7377340 |
| C    | -1.9504023 | -0.1340835 | 2.8071178  |
| C    | -3.1405072 | 0.4981115  | 3.0979555  |
| H    | -3.5150622 | 0.4912854  | 4.1119174  |
| C    | -3.8644469 | 1.0998638  | 2.0587979  |
| H    | -4.8032880 | 1.5978740  | 2.2690045  |
| C    | -3.4089012 | 1.0143637  | 0.7684181  |
| H    | -3.9819499 | 1.4188002  | -0.0518891 |

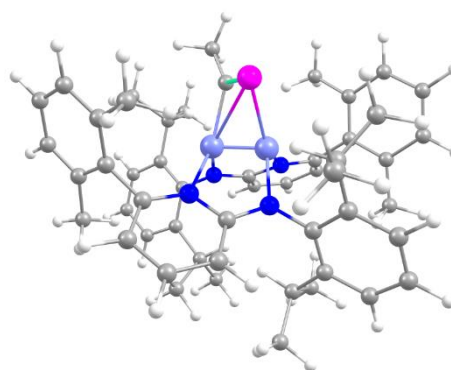

|    |            |            |            |
|----|------------|------------|------------|
| C  | -2.1852074 | 0.3520440  | 0.4965009  |
| C  | -1.2454014 | -0.9399958 | 3.8589401  |
| C  | -1.4860411 | -2.3312035 | 3.8898040  |
| C  | -0.8582984 | -3.1066233 | 4.8627674  |
| H  | -1.0354473 | -4.1754165 | 4.8796863  |
| C  | -0.0338801 | -2.5258996 | 5.8151883  |
| H  | 0.4469443  | -3.1404061 | 6.5664869  |
| C  | 0.1534912  | -1.1534433 | 5.8140122  |
| H  | 0.7753223  | -0.6931525 | 6.5726091  |
| C  | -0.4474534 | -0.3409841 | 4.8504377  |
| C  | -2.4717356 | -2.9843563 | 2.9545665  |
| H  | -3.4959413 | -2.7126652 | 3.2262755  |
| H  | -2.3891571 | -4.0698608 | 3.0070835  |
| H  | -2.3228157 | -2.6836898 | 1.9192987  |
| C  | -0.2166004 | 1.1453908  | 4.9126001  |
| H  | 0.5848412  | 1.4485269  | 4.2378378  |
| H  | 0.0785257  | 1.4412025  | 5.9198456  |
| H  | -1.1064718 | 1.7104898  | 4.6386295  |
| C  | -2.3803366 | 0.6681098  | -1.8666914 |
| C  | -2.2265603 | 2.0336960  | -2.2081560 |
| C  | -2.8926018 | 2.5275869  | -3.3301192 |
| H  | -2.7723370 | 3.5698557  | -3.5983725 |
| C  | -3.7016770 | 1.7200984  | -4.1107574 |
| H  | -4.2076878 | 2.1256701  | -4.9783767 |
| C  | -3.8655945 | 0.3913077  | -3.7602642 |
| H  | -4.5154022 | -0.2364458 | -4.3569779 |
| C  | -3.2270872 | -0.1546586 | -2.6464580 |
| C  | -1.3829191 | 3.0092551  | -1.3969239 |
| H  | -0.9911632 | 2.4749108  | -0.5330803 |
| C  | -0.1812988 | 3.5344173  | -2.1988731 |
| H  | 0.4939439  | 2.7277157  | -2.4829957 |
| H  | 0.3876353  | 4.2522355  | -1.6056768 |
| H  | -0.5025216 | 4.0419443  | -3.1114313 |
| C  | -2.2297182 | 4.1837870  | -0.8769600 |
| H  | -1.6206439 | 4.8497116  | -0.2628645 |
| H  | -3.0656049 | 3.8369671  | -0.2680930 |
| H  | -2.6363499 | 4.7784275  | -1.6977957 |
| C  | -3.5238563 | -1.6008167 | -2.2811832 |
| H  | -2.8333106 | -1.8818059 | -1.4893298 |
| C  | -4.9483421 | -1.7471263 | -1.7175823 |
| H  | -5.1015866 | -1.1028601 | -0.8504545 |
| H  | -5.1335488 | -2.7793318 | -1.4090059 |
| H  | -5.6986331 | -1.4842091 | -2.4675566 |
| C  | -3.3051559 | -2.5666324 | -3.4545462 |
| H  | -3.9980601 | -2.3705706 | -4.2757496 |
| H  | -3.4712814 | -3.5967330 | -3.1317072 |
| H  | -2.2911635 | -2.4931706 | -3.8509997 |
| C  | -0.5333265 | -3.0382850 | -0.2075709 |
| P  | 1.0274410  | -3.2383789 | 0.4028397  |
| C  | -1.5704935 | -4.0663656 | -0.5499841 |
| Cr | -0.0856414 | -1.1472022 | -0.7578972 |
| N  | 1.5336315  | -0.1113488 | -1.4915365 |
| N  | 1.7499252  | 0.3234365  | 0.7668897  |
| C  | 2.0510893  | -0.1383621 | -2.7521171 |
| C  | 3.1851876  | 0.5713119  | -3.0844133 |
| H  | 3.5604946  | 0.5335406  | -4.0974907 |
| C  | 3.8588319  | 1.2890072  | -2.0859205 |
| H  | 4.7557235  | 1.8460833  | -2.3283584 |
| C  | 3.4083239  | 1.2439585  | -0.7920041 |
| H  | 3.9465822  | 1.7370240  | 0.0029870  |
| C  | 2.2349009  | 0.5127393  | -0.4804078 |
| C  | 1.4273645  | -1.0649202 | -3.7545655 |
| C  | 1.8318642  | -2.4165885 | -3.7421409 |
| C  | 1.2792687  | -3.2966337 | -4.6725913 |
| H  | 1.5815461  | -4.3370878 | -4.6565975 |
| C  | 0.3753627  | -2.8524480 | -5.6256504 |
| H  | -0.0432261 | -3.5465857 | -6.3442839 |
| C  | 0.0277677  | -1.5110272 | -5.6692613 |
| H  | -0.6566165 | -1.1551923 | -6.4300569 |
| C  | 0.5472035  | -0.5997232 | -4.7487045 |
| C  | 2.9122507  | -2.9141229 | -2.8154952 |
| H  | 3.8942622  | -2.5738583 | -3.1571617 |
| H  | 2.9274387  | -4.0036350 | -2.7916145 |
| H  | 2.7859422  | -2.5571706 | -1.7944243 |
| C  | 0.1656199  | 0.8519771  | -4.8589211 |
| H  | -0.4760527 | 1.1608764  | -4.0344523 |
| H  | -0.3808558 | 1.0336633  | -5.7840901 |
| H  | 1.0421167  | 1.5015254  | -4.8479093 |

|   |            |            |            |
|---|------------|------------|------------|
| C | 2.4518610  | 0.9114193  | 1.8730478  |
| C | 2.2346080  | 2.2632861  | 2.2295104  |
| C | 2.8871072  | 2.7770812  | 3.3505175  |
| H | 2.7186432  | 3.8089803  | 3.6330767  |
| C | 3.7447603  | 2.0006694  | 4.1117754  |
| H | 4.2352804  | 2.4191465  | 4.9822000  |
| C | 3.9839832  | 0.6906127  | 3.7341762  |
| H | 4.6770978  | 0.0910422  | 4.3113411  |
| C | 3.3670708  | 0.1280593  | 2.6161530  |
| C | 1.3467282  | 3.2027613  | 1.4234522  |
| H | 0.9770730  | 2.6507247  | 0.5608953  |
| C | 0.1257890  | 3.6794660  | 2.2251471  |
| H | -0.5244914 | 2.8477526  | 2.4936410  |
| H | -0.4620706 | 4.3873859  | 1.6385371  |
| H | 0.4254689  | 4.1843815  | 3.1464263  |
| C | 2.1435933  | 4.4101824  | 0.8993283  |
| H | 1.5081614  | 5.0455703  | 0.2788668  |
| H | 2.9962136  | 4.0967124  | 0.2954556  |
| H | 2.5212968  | 5.0266582  | 1.7179507  |
| C | 3.7518447  | -1.2907258 | 2.2199237  |
| H | 3.1737574  | -1.5564968 | 1.3374886  |
| C | 5.2370891  | -1.3813230 | 1.8301008  |
| H | 5.4795807  | -0.6837452 | 1.0263602  |
| H | 5.4752096  | -2.3903046 | 1.4846108  |
| H | 5.8905103  | -1.1574044 | 2.6767731  |
| C | 3.4132093  | -2.3131257 | 3.3148491  |
| H | 3.9940040  | -2.1348927 | 4.2231590  |
| H | 3.6367254  | -3.3252955 | 2.9702862  |
| H | 2.3568701  | -2.2765919 | 3.5859063  |
| H | -1.3905021 | -5.0249391 | -0.0573774 |
| H | -1.5717987 | -4.2449205 | -1.6296474 |
| H | -2.5775788 | -3.7312612 | -0.2914558 |

**Table S10.** Cartesian coordinates of the optimized geometry of  $[L_2Cr_2\{1,3-(AdCP)_2\}]$  at the RI-B3LYP/def2-TZVP level of theory.

| Atom | x          | y          | z          |
|------|------------|------------|------------|
| Cr   | -0.0171404 | -0.8778609 | -0.0208500 |
| Cr   | -0.1264478 | 0.8474807  | 0.0314637  |
| P    | 2.0647067  | 0.0288008  | -1.2427953 |
| P    | 1.9691958  | 0.2239157  | 1.4263740  |
| N    | -1.0755863 | -1.2611096 | -1.7917434 |
| N    | -1.4894926 | 1.0155794  | -1.5155307 |
| N    | -1.3578755 | 1.0858956  | 1.7135860  |
| N    | -1.5029180 | -1.2165980 | 1.3798174  |
| C    | 2.0913263  | -1.1008751 | 0.1728394  |
| C    | 1.9364581  | 1.3493625  | 0.0202218  |
| C    | -1.7691448 | -0.1295408 | -2.1764598 |
| C    | -2.7088841 | -0.1967966 | -3.2415925 |
| H    | -3.2437860 | 0.6957767  | -3.5177825 |
| C    | -2.9021807 | -1.3639023 | -3.9199229 |
| H    | -3.6275532 | -1.4198286 | -4.7225751 |
| C    | -2.1014927 | -2.4650187 | -3.6066336 |
| H    | -2.1482257 | -3.3727053 | -4.1912843 |
| C    | -1.1748187 | -2.3754407 | -2.5872055 |
| C    | -0.1870280 | -3.5130453 | -2.5701552 |
| C    | 0.9168648  | -3.3996620 | -3.4447028 |
| C    | 1.7314191  | -4.5111117 | -3.6550551 |
| H    | 2.5769071  | -4.4216613 | -4.3268586 |
| C    | 1.4625004  | -5.7245677 | -3.0399946 |
| H    | 2.1007135  | -6.5809085 | -3.2204351 |
| C    | 0.3702215  | -5.8340236 | -2.1962861 |
| H    | 0.1499481  | -6.7805584 | -1.7170498 |
| C    | -0.4706088 | -4.7454371 | -1.9576348 |
| C    | 1.1924749  | -2.1401617 | -4.2256521 |
| H    | 0.4374572  | -1.9924519 | -5.0028100 |
| H    | 2.1651671  | -2.2000554 | -4.7143175 |
| H    | 1.1879664  | -1.2511677 | -3.5959124 |
| C    | -1.6826518 | -4.9473764 | -1.0930713 |
| H    | -1.8363201 | -4.1247609 | -0.4000565 |
| H    | -1.5919981 | -5.8627670 | -0.5086892 |
| H    | -2.5889182 | -5.0317494 | -1.6986491 |
| C    | -2.1247641 | 2.2147658  | -2.0135376 |
| C    | -1.4306680 | 3.0402970  | -2.9398891 |
| C    | -2.0284984 | 4.2304210  | -3.3558765 |
| H    | -1.5022377 | 4.8747466  | -4.0458348 |

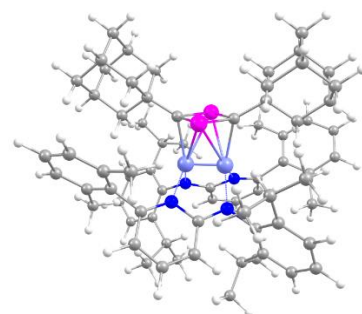

|   |            |            |            |
|---|------------|------------|------------|
| C | -3.2900957 | 4.6047287  | -2.9240526 |
| H | -3.7292771 | 5.5364970  | -3.2591854 |
| C | -3.9929471 | 3.7578480  | -2.0894655 |
| H | -4.9975702 | 4.0265810  | -1.7880557 |
| C | -3.4469360 | 2.5560493  | -1.6344495 |
| C | -0.0989664 | 2.6419709  | -3.5738099 |
| H | 0.4665177  | 2.0691730  | -2.8374692 |
| C | 0.7580943  | 3.8370918  | -4.0163268 |
| H | 0.3590393  | 4.3026716  | -4.9204476 |
| H | 1.7667925  | 3.4951049  | -4.2549293 |
| H | 0.8332347  | 4.6078878  | -3.2505315 |
| C | -0.3017159 | 1.7301830  | -4.7999189 |
| H | -0.8090783 | 0.8021661  | -4.5514623 |
| H | 0.6664503  | 1.4765917  | -5.2383851 |
| H | -0.8924019 | 2.2445057  | -5.5628311 |
| C | -4.3650047 | 1.6390300  | -0.8314536 |
| H | -3.7926963 | 0.7563333  | -0.5540610 |
| C | -4.8923206 | 2.2775470  | 0.4613867  |
| H | -4.0884881 | 2.5412125  | 1.1427351  |
| H | -5.5513464 | 1.5786269  | 0.9801859  |
| H | -5.4712382 | 3.1802044  | 0.2527272  |
| C | -5.5657047 | 1.1859356  | -1.6857532 |
| H | -6.1950881 | 2.0365621  | -1.9563412 |
| H | -6.1867395 | 0.4864808  | -1.1232013 |
| H | -5.2576598 | 0.6924396  | -2.6063518 |
| C | -1.9540596 | -0.1212078 | 2.0298654  |
| C | -2.9707454 | -0.1760382 | 3.0227089  |
| H | -3.4192149 | -1.1269005 | 3.2545759  |
| C | -3.3482112 | 0.9530349  | 3.6876978  |
| H | -4.1341636 | 0.9160351  | 4.4323215  |
| C | -2.6549780 | 2.1410454  | 3.4444394  |
| H | -2.8487354 | 3.0282568  | 4.0300943  |
| C | -1.6392815 | 2.1682725  | 2.5092522  |
| C | -0.7808102 | 3.4049669  | 2.6110241  |
| C | -1.1238965 | 4.6149623  | 1.9841145  |
| C | -0.4765572 | 5.7903548  | 2.3693835  |
| H | -0.7466794 | 6.7201949  | 1.8828265  |
| C | 0.4864398  | 5.7853626  | 3.3642866  |
| H | 0.9700067  | 6.7081678  | 3.6607379  |
| C | 0.8310158  | 4.5891266  | 3.9748953  |
| H | 1.5836492  | 4.5775164  | 4.7543184  |
| C | 0.2056590  | 3.3938569  | 3.6231748  |
| C | -2.2099686 | 4.6996567  | 0.9489809  |
| H | -2.1944023 | 3.8566558  | 0.2637432  |
| H | -2.1098056 | 5.6103378  | 0.3583576  |
| H | -3.1983257 | 4.7185922  | 1.4154661  |
| C | 0.5423694  | 2.1455688  | 4.3985598  |
| H | -0.2709828 | 1.8784470  | 5.0788048  |
| H | 1.4396089  | 2.3008627  | 4.9980038  |
| H | 0.7174382  | 1.2890395  | 3.7485757  |
| C | -2.0766794 | -2.4797182 | 1.7828936  |
| C | -3.3471674 | -2.8970435 | 1.3127133  |
| C | -3.8405591 | -4.1414195 | 1.7094205  |
| H | -4.8064365 | -4.4649368 | 1.3426035  |
| C | -3.1330711 | -4.9660159 | 2.5620023  |
| H | -3.5315148 | -5.9309182 | 2.8510656  |
| C | -1.9181450 | -4.5312458 | 3.0643886  |
| H | -1.3863622 | -5.1646621 | 3.7598689  |
| C | -1.3770848 | -3.2942508 | 2.7124585  |
| C | -4.2639196 | -2.0369840 | 0.4486164  |
| H | -3.7362213 | -1.1135089 | 0.2197605  |
| C | -4.6334820 | -2.7057744 | -0.8835253 |
| H | -3.7554845 | -2.9290542 | -1.4832998 |
| H | -5.2772058 | -2.0453168 | -1.4675967 |
| H | -5.1801473 | -3.6377473 | -0.7220090 |
| C | -5.5599966 | -1.6781015 | 1.2013668  |
| H | -6.1420941 | -2.5745209 | 1.4258114  |
| H | -6.1857334 | -1.0287798 | 0.5863965  |
| H | -5.3650600 | -1.1616272 | 2.1399247  |
| C | -0.1010764 | -2.8350703 | 3.4124078  |
| H | 0.4623427  | -2.2181103 | 2.7107067  |
| C | 0.8012686  | -3.9909205 | 3.8622613  |
| H | 0.3767385  | -4.5252250 | 4.7151817  |
| H | 1.7675454  | -3.5997988 | 4.1841818  |
| H | 0.9754025  | -4.7144197 | 3.0661254  |
| C | -0.4120850 | -1.9585914 | 4.6406877  |
| H | -0.9728424 | -1.0641109 | 4.3818343  |
| H | 0.5177576  | -1.6447533 | 5.1211034  |

|   |            |            |            |
|---|------------|------------|------------|
| H | -0.9961487 | -2.5228899 | 5.3727706  |
| C | 2.9807506  | -2.3603158 | 0.3277912  |
| C | 2.2425158  | -3.7122380 | 0.2158602  |
| H | 1.4597779  | -3.7698839 | 0.9769955  |
| H | 1.7487050  | -3.7766031 | -0.7519370 |
| C | 3.2159714  | -4.8994216 | 0.3760751  |
| H | 2.6502016  | -5.8318505 | 0.2873916  |
| C | 3.9065833  | -4.8386171 | 1.7469046  |
| H | 4.5971334  | -5.6818296 | 1.8562648  |
| H | 3.1731406  | -4.9247526 | 2.5510597  |
| C | 4.6720220  | -3.5122853 | 1.8661108  |
| H | 5.1460000  | -3.4463770 | 2.8508785  |
| C | 3.7010604  | -2.3301265 | 1.7040399  |
| H | 4.2535222  | -1.3917112 | 1.8036023  |
| H | 2.9618450  | -2.3424853 | 2.5094317  |
| C | 4.0880440  | -2.3428867 | -0.7636606 |
| H | 4.6349955  | -1.3972815 | -0.7048997 |
| H | 3.6243470  | -2.3777064 | -1.7532958 |
| C | 5.0634588  | -3.5206912 | -0.6042621 |
| H | 5.8187146  | -3.4635496 | -1.3948906 |
| C | 4.2913633  | -4.8430837 | -0.7204324 |
| H | 3.8295028  | -4.9214461 | -1.7065553 |
| H | 4.9767852  | -5.6912544 | -0.6164347 |
| C | 5.7456983  | -3.4410331 | 0.7696382  |
| H | 6.4603982  | -4.2625410 | 0.8858749  |
| H | 6.3133696  | -2.5086509 | 0.8569275  |
| C | 2.6227077  | 2.7316735  | -0.0650886 |
| C | 3.7157366  | 2.6760332  | -1.1711380 |
| H | 4.4010157  | 1.8505790  | -0.9568830 |
| H | 3.2508401  | 2.4525104  | -2.1356214 |
| C | 4.4999893  | 3.9936682  | -1.2675156 |
| H | 5.2525590  | 3.9005253  | -2.0572807 |
| C | 5.1901210  | 4.2772003  | 0.0751625  |
| H | 5.7699795  | 5.2042300  | 0.0147766  |
| H | 5.8952957  | 3.4739609  | 0.3134695  |
| C | 4.1208121  | 4.3901076  | 1.1719915  |
| H | 4.6007338  | 4.5870565  | 2.1361188  |
| C | 3.3411245  | 3.0662549  | 1.2687714  |
| H | 2.6081273  | 3.1265238  | 2.0765950  |
| H | 4.0287897  | 2.2545398  | 1.5224123  |
| C | 1.6814796  | 3.9117996  | -0.3929418 |
| H | 0.9270980  | 4.0023970  | 0.3901974  |
| H | 1.1524449  | 3.7109424  | -1.3245144 |
| C | 2.4640592  | 5.2373351  | -0.5059964 |
| H | 1.7621474  | 6.0429338  | -0.7446221 |
| C | 3.5323378  | 5.1373349  | -1.6065908 |
| H | 3.0691616  | 4.9586911  | -2.5799332 |
| H | 4.0777992  | 6.0839354  | -1.6832013 |
| C | 3.1602403  | 5.5388862  | 0.8297002  |
| H | 3.7127976  | 6.4823715  | 0.7599523  |
| H | 2.4198474  | 5.6571582  | 1.6213606  |

**Table S11.** Cartesian coordinates of the optimized geometry of  $[L_2Cr_2\{1,2-(AdCP)_2\}]$  at the RI-B3LYP/def2-TZVP level of theory.

| Atom | x          | y          | z          |
|------|------------|------------|------------|
| Cr   | -0.1408198 | -0.2403884 | -0.5762540 |
| Cr   | -0.2332659 | 1.3986212  | -0.1556759 |
| P    | 1.7095911  | 0.8464817  | -1.9550030 |
| P    | 2.0236853  | 2.1064368  | -0.1519662 |
| C    | 2.4431318  | 0.4301831  | 0.4429990  |
| N    | -1.4569543 | -0.2415366 | -2.2609924 |
| N    | -1.6623601 | 1.9491275  | -1.4892900 |
| N    | -1.1732723 | 1.3396447  | 1.6997502  |
| N    | -1.5013558 | -0.8446307 | 0.9502242  |
| C    | 2.2585110  | -0.3945278 | -0.7138839 |
| C    | -2.0678541 | 0.9951677  | -2.3557143 |
| C    | -3.0601288 | 1.2467934  | -3.3422978 |
| H    | -3.5062761 | 2.2255228  | -3.3913279 |
| C    | -3.4381313 | 0.2614221  | -4.2043763 |
| H    | -4.2171562 | 0.4354799  | -4.9367025 |
| C    | -2.7586499 | -0.9561613 | -4.1621016 |
| H    | -2.9574692 | -1.7270609 | -4.8927010 |
| C    | -1.7458978 | -1.1594740 | -3.2431218 |
| C    | -0.9174242 | -2.3751230 | -3.5852469 |
| C    | -0.0182985 | -2.2203962 | -4.6669767 |

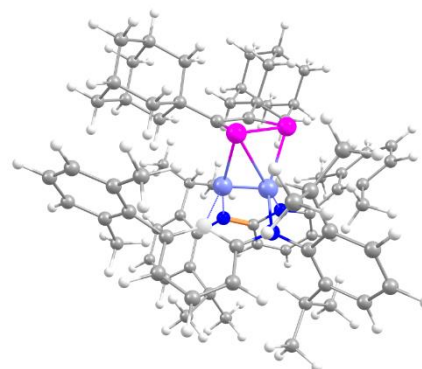



|   |            |            |            |
|---|------------|------------|------------|
| C | 0.5494695  | -3.3527893 | -5.2460049 |
| H | 1.2321909  | -3.2297252 | -6.0783132 |
| C | 0.2479472  | -4.6247726 | -4.7815863 |
| H | 0.6954790  | -5.4952966 | -5.2454854 |
| C | -0.6261010 | -4.7712769 | -3.7191444 |
| H | -0.8715475 | -5.7610995 | -3.3521242 |
| C | -1.2301277 | -3.6621895 | -3.1208389 |
| C | 0.3101920  | -0.8678826 | -5.2479088 |
| H | -0.5331762 | -0.4629504 | -5.8127508 |
| H | 1.1598245  | -0.9432793 | -5.9268047 |
| H | 0.5598536  | -0.1396863 | -4.4756437 |
| C | -2.2687689 | -3.8985087 | -2.0638312 |
| H | -2.2899957 | -3.1099882 | -1.3197041 |
| H | -2.0932704 | -4.8424307 | -1.5482226 |
| H | -3.2674704 | -3.9501350 | -2.5073196 |
| C | -2.1499765 | 3.2855483  | -1.7456933 |
| C | -1.4030067 | 4.1421434  | -2.5905320 |
| C | -1.8622141 | 5.4405592  | -2.8137472 |
| H | -1.2888118 | 6.0991544  | -3.4540117 |
| C | -3.0390591 | 5.9010328  | -2.2502825 |
| H | -3.3788171 | 6.9124784  | -2.4371555 |
| C | -3.7862429 | 5.0456933  | -1.4593552 |
| H | -4.7193384 | 5.3982112  | -1.0382602 |
| C | -3.3732586 | 3.7389924  | -1.1966308 |
| C | -0.1408558 | 3.7019819  | -3.3202823 |
| H | 0.1149482  | 2.7025941  | -2.9752270 |
| C | 1.0630350  | 4.6114630  | -3.0300641 |
| H | 0.9083940  | 5.6221026  | -3.4152118 |
| H | 1.9591077  | 4.2097711  | -3.5076216 |
| H | 1.2640864  | 4.6879002  | -1.9606097 |
| C | -0.3813994 | 3.6032235  | -4.8370250 |
| H | -1.2082112 | 2.9295162  | -5.0664822 |
| H | 0.5130408  | 3.2233120  | -5.3363810 |
| H | -0.6150160 | 4.5805139  | -5.2668921 |
| C | -4.3037151 | 2.8599242  | -0.3687562 |
| H | -3.7921081 | 1.9162885  | -0.1833120 |
| C | -4.6549568 | 3.4800739  | 0.9932730  |
| H | -3.7680762 | 3.7190907  | 1.5773116  |
| H | -5.2565927 | 2.7807671  | 1.5778014  |
| H | -5.2386717 | 4.3957218  | 0.8762010  |
| C | -5.6060399 | 2.5593699  | -1.1345491 |
| H | -6.1491580 | 3.4813978  | -1.3542223 |
| H | -6.2628731 | 1.9268078  | -0.5342226 |
| H | -5.4184652 | 2.0480815  | -2.0780340 |
| C | -1.8214697 | 0.1234165  | 1.8322971  |
| C | -2.7809655 | -0.0527931 | 2.8719449  |
| H | -3.2537966 | -1.0129787 | 2.9881513  |
| C | -3.1094413 | 0.9898094  | 3.6851393  |
| H | -3.8802922 | 0.8757713  | 4.4380314  |
| C | -2.3781080 | 2.1799601  | 3.5969574  |
| H | -2.5363146 | 2.9764649  | 4.3085285  |
| C | -1.3522431 | 2.2931833  | 2.6850820  |
| C | -0.3574905 | 3.3908641  | 2.9829592  |
| C | -0.1216841 | 4.4993840  | 2.1564254  |
| C | 0.7642437  | 5.4986223  | 2.5648101  |
| H | 0.9292350  | 6.3472657  | 1.9112454  |
| C | 1.4109106  | 5.4270070  | 3.7836507  |
| H | 2.0947586  | 6.2089401  | 4.0905136  |
| C | 1.1630806  | 4.3461849  | 4.6165570  |
| H | 1.6584918  | 4.2861482  | 5.5784043  |
| C | 0.2859053  | 3.3285732  | 4.2478877  |
| C | -0.8116686 | 4.6714368  | 0.8411948  |
| H | -0.1536235 | 4.3846875  | 0.0190736  |
| H | -1.0916380 | 5.7127520  | 0.6758325  |
| H | -1.7116891 | 4.0720503  | 0.7726774  |
| C | 0.0721581  | 2.2145212  | 5.2494860  |
| H | -0.8298394 | 2.3748106  | 5.8437045  |
| H | 0.9097324  | 2.1751342  | 5.9455779  |
| H | -0.0268524 | 1.2360037  | 4.7825981  |
| C | -2.1994106 | -2.0977533 | 1.1068041  |
| C | -3.5559765 | -2.2500288 | 0.7171317  |
| C | -4.1704345 | -3.4924653 | 0.8821238  |
| H | -5.2036693 | -3.6109024 | 0.5809177  |
| C | -3.4997014 | -4.5751278 | 1.4185259  |
| H | -3.9970409 | -5.5311047 | 1.5284937  |
| C | -2.1890010 | -4.4139661 | 1.8330033  |
| H | -1.6753462 | -5.2524261 | 2.2826537  |
| C | -1.5278603 | -3.1919291 | 1.7083776  |

|   |            |            |            |
|---|------------|------------|------------|
| C | -4.4263158 | -1.1245961 | 0.1634996  |
| H | -3.8116518 | -0.2295526 | 0.0850097  |
| C | -4.9730560 | -1.4394257 | -1.2374400 |
| H | -4.1774005 | -1.6258361 | -1.9534752 |
| H | -5.5652658 | -0.5997091 | -1.6056625 |
| H | -5.6236982 | -2.3168827 | -1.2203516 |
| C | -5.6122956 | -0.8164140 | 1.0979413  |
| H | -6.2886634 | -1.6713127 | 1.1652181  |
| H | -6.1888700 | 0.0251034  | 0.7093374  |
| H | -5.2915107 | -0.5625884 | 2.1064793  |
| C | -0.1444329 | -3.0491386 | 2.3280031  |
| H | 0.3873446  | -2.2755743 | 1.7732149  |
| C | 0.6939064  | -4.3329226 | 2.2753103  |
| H | 0.3093067  | -5.0964401 | 2.9547653  |
| H | 1.7184445  | -4.1215080 | 2.5867704  |
| H | 0.7270075  | -4.7597333 | 1.2724159  |
| C | -0.2580736 | -2.5753437 | 3.7895876  |
| H | -0.7705789 | -1.6172878 | 3.8679070  |
| H | 0.7330427  | -2.4680626 | 4.2369872  |
| H | -0.8156722 | -3.3036953 | 4.3841143  |
| C | 3.2015688  | 0.3041492  | 1.7773644  |
| C | 3.3129979  | -1.1097608 | 2.3888576  |
| H | 2.3101044  | -1.4974239 | 2.5803001  |
| H | 3.7956680  | -1.7958353 | 1.6992506  |
| C | 4.1237706  | -1.0977774 | 3.6983835  |
| H | 4.1830214  | -2.1219598 | 4.0805404  |
| C | 3.4350054  | -0.1968198 | 4.7308362  |
| H | 3.9979264  | -0.1949957 | 5.6702874  |
| H | 2.4350395  | -0.5790477 | 4.9588355  |
| C | 3.3428010  | 1.2245528  | 4.1596960  |
| H | 2.8360166  | 1.8774317  | 4.8716361  |
| C | 2.5355915  | 1.2029614  | 2.8493908  |
| H | 2.4351546  | 2.2215865  | 2.4691224  |
| H | 1.5247731  | 0.8362873  | 3.0379775  |
| C | 4.6437678  | 0.8785230  | 1.5639031  |
| H | 4.5601661  | 1.9033858  | 1.1953815  |
| H | 5.1737189  | 0.3165590  | 0.7973209  |
| C | 5.4507670  | 0.8629465  | 2.8721551  |
| H | 6.4566649  | 1.2417326  | 2.6647201  |
| C | 5.5402921  | -0.5705286 | 3.4186679  |
| H | 6.0499917  | -1.2192969 | 2.6986216  |
| H | 6.1364304  | -0.5870930 | 4.3369787  |
| C | 4.7567775  | 1.7633435  | 3.9013146  |
| H | 5.3268830  | 1.7865160  | 4.8361554  |
| H | 4.7070984  | 2.7915395  | 3.5299528  |
| C | 2.9672499  | -1.7061269 | -1.1503424 |
| C | 2.7547260  | -1.9594320 | -2.6622690 |
| H | 1.6906402  | -2.0665381 | -2.8658351 |
| H | 3.1064307  | -1.0963706 | -3.2340014 |
| C | 3.4959863  | -3.2202000 | -3.1463998 |
| H | 3.2959583  | -3.3517119 | -4.2130549 |
| C | 3.0031124  | -4.4526653 | -2.3743032 |
| H | 3.5375297  | -5.3470679 | -2.7132279 |
| H | 1.9423823  | -4.6203112 | -2.5678051 |
| C | 3.2372642  | -4.2280615 | -0.8757665 |
| H | 2.8732111  | -5.0918591 | -0.3105712 |
| C | 2.4624386  | -2.9754881 | -0.4232599 |
| H | 2.5442668  | -2.8642315 | 0.6537326  |
| H | 1.3982420  | -3.1091640 | -0.6447188 |
| C | 4.5032351  | -1.5749161 | -0.9545550 |
| H | 4.7423009  | -1.4065971 | 0.0899472  |
| H | 4.8559351  | -0.6981344 | -1.5068714 |
| C | 5.2510248  | -2.8335047 | -1.4216039 |
| H | 6.3213920  | -2.6947659 | -1.2376629 |
| C | 5.0042799  | -3.0535198 | -2.9187170 |
| H | 5.3845135  | -2.2007976 | -3.4906813 |
| H | 5.5415750  | -3.9407015 | -3.2702317 |
| C | 4.7420326  | -4.0434323 | -0.6208079 |
| H | 5.2839309  | -4.9479846 | -0.9159853 |
| H | 4.9339677  | -3.8952755 | 0.4472637  |

**Table S2.** Cartesian coordinates of the optimized geometry of [L<sub>2</sub>Cr<sub>2</sub>(AdCP)] (**4**) at the RI-B3LYP/def2-TZVP level of theory.

| Atom | x          | y          | z          |
|------|------------|------------|------------|
| Cr   | 0.5515976  | -0.2146151 | 1.0366685  |
| N    | -1.2257950 | 0.6289094  | 1.6461780  |
| N    | -1.4628196 | 0.8305302  | -0.6550351 |
| C    | -1.7326496 | 0.6881126  | 2.9105701  |
| C    | -2.9945849 | 1.1824448  | 3.1626528  |
| H    | -3.3592021 | 1.2194569  | 4.1794805  |
| C    | -3.7835086 | 1.6189398  | 2.0902132  |
| H    | -4.7819422 | 1.9995498  | 2.2691440  |
| C    | -3.2991083 | 1.5411824  | 0.8105905  |
| H    | -3.9022924 | 1.8459916  | -0.0308274 |
| C    | -2.0023971 | 1.0197519  | 0.5743466  |
| C    | -0.9005790 | 0.1730309  | 4.0498758  |
| C    | -0.9033767 | -1.2078269 | 4.3386357  |
| C    | -0.1609324 | -1.6778911 | 5.4193072  |
| H    | -0.1581721 | -2.7398757 | 5.6344342  |
| C    | 0.5590826  | -0.8056931 | 6.2241567  |
| H    | 1.1385446  | -1.1863479 | 7.0563663  |
| C    | 0.5216996  | 0.5533203  | 5.9648919  |
| H    | 1.0686531  | 1.2406400  | 6.5994768  |
| C    | -0.2140245 | 1.0634760  | 4.8929348  |
| C    | -1.7520157 | -2.1677898 | 3.5503629  |
| H    | -2.8147715 | -1.9996689 | 3.7472113  |
| H    | -1.5203697 | -3.1987723 | 3.8174203  |
| H    | -1.6040803 | -2.0535582 | 2.4785269  |
| C    | -0.2893940 | 2.5564699  | 4.7187528  |
| H    | -0.6082927 | 2.8364190  | 3.7196466  |
| H    | 0.6779133  | 3.0192573  | 4.9133231  |
| H    | -1.0101890 | 2.9865076  | 5.4213411  |
| C    | -2.0970324 | 1.5008005  | -1.7615805 |
| C    | -1.9735047 | 2.9066769  | -1.9083759 |
| C    | -2.5943612 | 3.5357558  | -2.9875218 |
| H    | -2.5008365 | 4.6089776  | -3.0952656 |
| C    | -3.3267207 | 2.8285748  | -3.9229599 |
| H    | -3.8008307 | 3.3389620  | -4.7524549 |
| C    | -3.4509415 | 1.4595574  | -3.7753139 |
| H    | -4.0379013 | 0.9043688  | -4.4948787 |
| C    | -2.8577497 | 0.7783843  | -2.7114961 |
| C    | -1.2172038 | 3.8031666  | -0.9350985 |
| H    | -0.7740096 | 3.1757278  | -0.1631265 |
| C    | -0.0737624 | 4.5587181  | -1.6323851 |
| H    | 0.6794478  | 3.8751154  | -2.0250728 |
| H    | 0.4194992  | 5.2336433  | -0.9324008 |
| H    | -0.4416632 | 5.1638393  | -2.4631829 |
| C    | -2.1697791 | 4.7997440  | -0.2491836 |
| H    | -1.6336825 | 5.3974344  | 0.4893540  |
| H    | -2.9841347 | 4.2866394  | 0.2624075  |
| H    | -2.6101680 | 5.4876891  | -0.9743692 |
| C    | -3.1372967 | -0.7091194 | -2.5829381 |
| H    | -2.4079502 | -1.1169324 | -1.8843259 |
| C    | -4.5381839 | -0.9418994 | -1.9881247 |
| H    | -4.6364494 | -0.4845114 | -1.0026144 |
| H    | -4.7460641 | -2.0094520 | -1.8863287 |
| H    | -5.3069737 | -0.5130117 | -2.6357672 |
| C    | -2.9871773 | -1.4647424 | -3.9101944 |
| H    | -3.7496978 | -1.1722300 | -4.6349635 |
| H    | -3.1000551 | -2.5376473 | -3.7487969 |
| H    | -2.0099588 | -1.2916112 | -4.3607142 |
| C    | -0.0895945 | -2.3477488 | -0.0223960 |
| P    | 1.5043036  | -2.3045394 | 0.5382597  |
| C    | -0.9056311 | -3.6011960 | -0.3083062 |
| C    | -0.4034181 | -4.8120696 | 0.5262309  |
| H    | 0.6589357  | -4.9711804 | 0.3254685  |
| H    | -0.4893411 | -4.5763404 | 1.5912826  |
| C    | -1.1924976 | -6.0892323 | 0.1994249  |
| H    | -0.8075571 | -6.9124829 | 0.8097268  |
| C    | -1.0146373 | -6.4246161 | -1.2904763 |
| H    | -1.5560388 | -7.3430973 | -1.5400802 |
| H    | 0.0422900  | -6.6069537 | -1.5103975 |
| C    | -1.5398293 | -5.2555386 | -2.1391042 |
| H    | -1.4109023 | -5.4839756 | -3.2019173 |
| C    | -0.7486381 | -3.9762531 | -1.8084385 |
| H    | -1.0867398 | -3.1496450 | -2.4367545 |
| H    | 0.3120310  | -4.1261424 | -2.0285545 |
| C    | -2.4138681 | -3.4224340 | -0.0074480 |

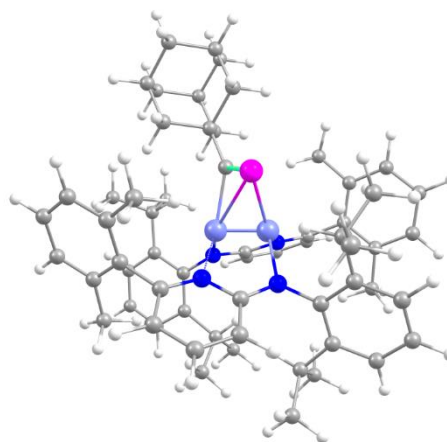

|    |            |            |            |
|----|------------|------------|------------|
| H  | -2.8071728 | -2.5775497 | -0.5701118 |
| H  | -2.5500373 | -3.1842026 | 1.0485904  |
| C  | -3.2032331 | -4.7010799 | -0.3448094 |
| H  | -4.2623334 | -4.5306590 | -0.1268383 |
| C  | -2.6819088 | -5.8693323 | 0.5061517  |
| H  | -2.8189054 | -5.6520904 | 1.5705238  |
| H  | -3.2526989 | -6.7786106 | 0.2902386  |
| C  | -3.0312591 | -5.0435726 | -1.8327894 |
| H  | -3.5962113 | -5.9489471 | -2.0783105 |
| H  | -3.4368600 | -4.2412053 | -2.4543581 |
| Cr | 0.1975595  | -0.3812785 | -0.6141562 |
| N  | 1.8240280  | 0.6890613  | -1.3481589 |
| N  | 2.0460740  | 1.1387261  | 0.9136834  |
| C  | 2.3396185  | 0.6768045  | -2.6104993 |
| C  | 3.5246897  | 1.3098437  | -2.9233890 |
| H  | 3.8868862  | 1.2826381  | -3.9415265 |
| C  | 4.2602235  | 1.9317365  | -1.9078735 |
| H  | 5.2061232  | 2.4096734  | -2.1322516 |
| C  | 3.7941468  | 1.8959917  | -0.6204452 |
| H  | 4.3662771  | 2.3171878  | 0.1913137  |
| C  | 2.5562414  | 1.2718423  | -0.3322926 |
| C  | 1.6605174  | -0.1211132 | -3.6841924 |
| C  | 2.0074629  | -1.4784468 | -3.8355320 |
| C  | 1.4462289  | -2.2057070 | -4.8857446 |
| H  | 1.7037378  | -3.2522856 | -4.9980320 |
| C  | 0.5904206  | -1.6025625 | -5.7944338 |
| H  | 0.1666407  | -2.1790441 | -6.6078229 |
| C  | 0.2896898  | -0.2547135 | -5.6656745 |
| H  | -0.3646442 | 0.2241414  | -6.3842892 |
| C  | 0.8187992  | 0.5042527  | -4.6219206 |
| C  | 3.0385585  | -2.1378736 | -2.9553235 |
| H  | 4.0457194  | -1.8231637 | -3.2440862 |
| H  | 2.9907944  | -3.2226990 | -3.0511072 |
| H  | 2.9149401  | -1.8867193 | -1.9027970 |
| C  | 0.5207469  | 1.9776473  | -4.5521986 |
| H  | 0.1763859  | 2.2736723  | -3.5636538 |
| H  | -0.2538287 | 2.2493372  | -5.2682197 |
| H  | 1.4113787  | 2.5709484  | -4.7757597 |
| C  | 2.7561497  | 1.7272051  | 2.0213718  |
| C  | 2.6304139  | 3.1074713  | 2.3191824  |
| C  | 3.2443384  | 3.6076535  | 3.4678265  |
| H  | 3.1457656  | 4.6605004  | 3.7013795  |
| C  | 3.9896803  | 2.7998508  | 4.3093221  |
| H  | 4.4484361  | 3.2104781  | 5.2006400  |
| C  | 4.1732717  | 1.4711544  | 3.9722626  |
| H  | 4.7979620  | 0.8466358  | 4.5987579  |
| C  | 3.5937277  | 0.9193150  | 2.8294385  |
| C  | 1.9420218  | 4.1099748  | 1.3993431  |
| H  | 1.4821757  | 3.5563148  | 0.5826155  |
| C  | 0.8389434  | 4.9174354  | 2.0987242  |
| H  | 0.0037525  | 4.2871969  | 2.3974622  |
| H  | 0.4539081  | 5.6877141  | 1.4284027  |
| H  | 1.2127921  | 5.4241545  | 2.9904156  |
| C  | 2.9731417  | 5.0822949  | 0.7929782  |
| H  | 2.4925202  | 5.7473863  | 0.0722385  |
| H  | 3.7746833  | 4.5557758  | 0.2764479  |
| H  | 3.4258177  | 5.7053364  | 1.5677753  |
| C  | 3.9649430  | -0.5125151 | 2.4713360  |
| H  | 3.4416805  | -0.7706097 | 1.5548130  |
| C  | 5.4696826  | -0.6403776 | 2.1757810  |
| H  | 5.7795922  | 0.0479559  | 1.3873740  |
| H  | 5.7025278  | -1.6561668 | 1.8470615  |
| H  | 6.0750279  | -0.4302973 | 3.0607773  |
| C  | 3.5376322  | -1.5197089 | 3.5478690  |
| H  | 4.0657135  | -1.3474681 | 4.4889223  |
| H  | 3.7596591  | -2.5386850 | 3.2229471  |
| H  | 2.4685243  | -1.4577479 | 3.7551374  |

## 5. References

- [1] G. Becker, G. Gresser, W. Uhl, *Z. Naturforsch., Teil B* **1981**, 36B, 16.
- [2] J.-C. Guillemin, T. Janati, J.-M. Denis, *J. Org. Chem.* **2001**, 7864.
- [3] T. Allspach, M. Regitz, G. Becker, W. Becker, *Synthesis* **1986**, 31.
- [4] a) A. Noor, F. R. Wagner, R. Kempe, *Angew. Chem. Int. Ed.* **2008**, 47, 7246; b) A. Noor, F. R. Wagner, R. Kempe, *Angew. Chem.* **2008**, 120, 7356.
- [5] O. V. Dolomanov, L. J. Bourhis, R. J. Gildea, J. A. K. Howard, H. Puschmann, *J. Appl. Crystallogr.* **2009**, 42, 339.
- [6] G. M. Sheldrick, *Acta Cryst.* **2015**, A71, 3.
- [7] G. M. Sheldrick, *Acta Cryst.* **2015**, C71, 3.
- [8] a) F. Furche, R. Ahlrichs, C. Hättig, W. Klopper, M. Sierka, F. Weigend, *WIREs Comput. Mol. Sci.* **2014**, 4, 91; b) R. Ahlrichs, M. Bär, M. Häser, H. Horn, C. Kölmel, *Chem. Phys. Lett.* **1989**, 162, 165; c) O. Treutler, R. Ahlrichs, *J. Chem. Phys.* **1995**, 102, 346
- [9] TURBOMOLE V6.4, a development of University of Karlsruhe and Forschungszentrum Karlsruhe GmbH, <http://www.turbomole.com>
- [10] a) K. Eichkorn, O. Treutler, H. Öhm, M. Häser, R. Ahlrichs, *Chem. Phys. Lett.* **1995**, 242, 652; b) K. Eichkorn, F. Weigend, O. Treutler, R. Ahlrichs, *Theor. Chem. Acc.* **1997**, 97, 119.
- [11] a) P. A. M. Dirac, *Proc. Royal Soc. A* **1929**, 714; b) J. C. Slater, *Phys. Rev.* **1951**, 385; c) S. H. Vosko, L. Wilk, M. Nusair, *Can. J. Phys.* **1980**, 1200; d) A. D. Becke, *Phys. Rev. A* **1988**, 3098; e) A. D. Becke, *J. Chem. Phys.* **1993**, 5648; f) C. Lee, W. Yang, R. G. Parr, *Phys. Rev. B* **1988**, 785.
- [12] a) F. Weigend, M. Häser, H. Patzelt, R. Ahlrichs, *Chem. Phys. Letters* **1998**, 294, 143; b) F. Weigend, R. Ahlrichs, *Phys. Chem. Chem. Phys.* **2005**, 7, 3297.
- [13] M. Sierka, A. Hogeckamp, R. Ahlrichs, *J. Chem. Phys.* **2003**, 118, 9136.
